# Supplementary material for: Multi-compartmental diversification of neutralizing antibody lineages dissected in SARS-CoV-2 spike-immunized macaques
Source: PubMed Central journal article supplement (PMC11283548; doi:10.1038/s41467-024-50286-0), 2024-07-27
Supplement: 41467_2024_50286_MOESM1_ESM.pdf [file 41467_2024_50286_MOESM1_ESM.pdf]

# Supplementary Information for

## “Multi-compartmental diversification of neutralizing antibody lineages dissected in SARS-CoV-2 spike-immunized macaques”

Marco Mandolesi<sup>1,\*</sup>, Hrishikesh Das<sup>2</sup>, Liset de Vries<sup>1</sup>, Yiqiu Yang<sup>1</sup>, Changil Kim<sup>1</sup>, Manojj Dhinakaran<sup>1</sup>, Xaquín Castro Dopico<sup>1</sup>, Julian Fischbach<sup>1</sup>, Sungyong Kim<sup>1</sup>, Mariia V. Guryleva<sup>1</sup>, Monika Àdori<sup>1</sup>, Mark Chernyshev<sup>1</sup>, Aron Stålmårck<sup>1</sup>, Leo Hanke<sup>1</sup>, Gerald M. McInerney<sup>1</sup>, Daniel J. Sheward<sup>1</sup>, Martin Corcoran<sup>1</sup>, B. Martin Hållberg<sup>2</sup>, Ben Murrell<sup>1,#</sup>, Gunilla B. Karlsson Hedestam<sup>1,#,\*</sup>.

<sup>1</sup>Department of Microbiology, Tumor and Cell Biology, Karolinska Institutet, Stockholm, Sweden,

<sup>2</sup>Department of Cell and Molecular Biology, Karolinska Institutet, Stockholm, Sweden

#Equal contribution

\*Correspondence:

Marco Mandolesi, Department of Microbiology, Tumor and Cell Biology, Karolinska Institutet, S-171 77 Stockholm, Sweden. E-mail: [marco.mandolesi@ki.se](mailto:marco.mandolesi@ki.se)

Gunilla B. Karlsson Hedestam, Department of Microbiology, Tumor and Cell Biology, Karolinska Institutet, S-171 77 Stockholm, Sweden. E-mail: [gunilla.karlsson.hedestam@ki.se](mailto:gunilla.karlsson.hedestam@ki.se)

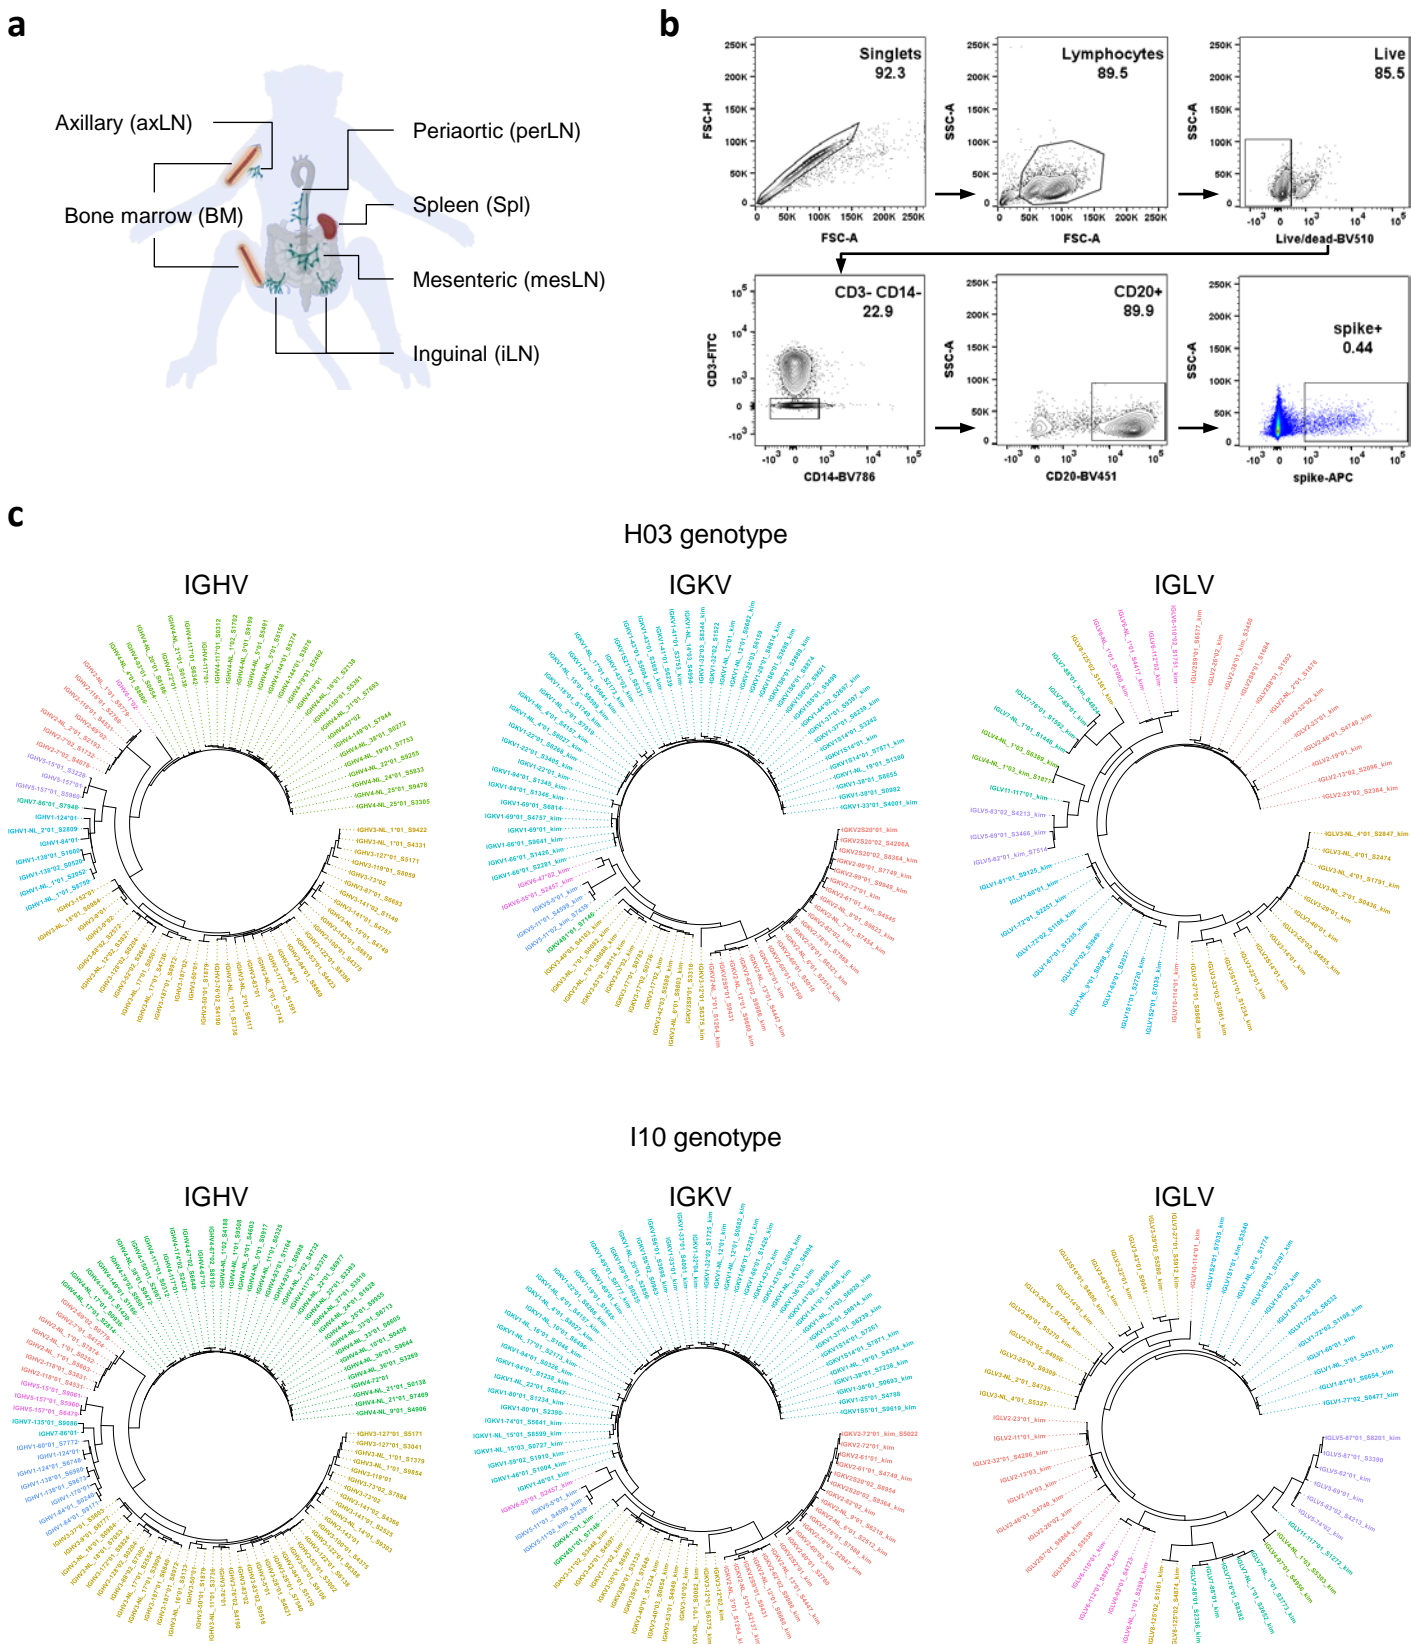

**Supplementary Fig 1. Overview of sampled compartments, sorting strategy and germline heavy and light chain V alleles in H03 and I10.** **a** Schematic representation of samples collected during the immunization regimen and at necropsy. Figure created with BioRender.com **b** Representative gating strategy (from iLN-R1) to sort spike-binding B cells. **c** *IGHV*, *IGKV* and *IGLV* germline alleles identified in H03 and I10 with alternating colors based on gene family.

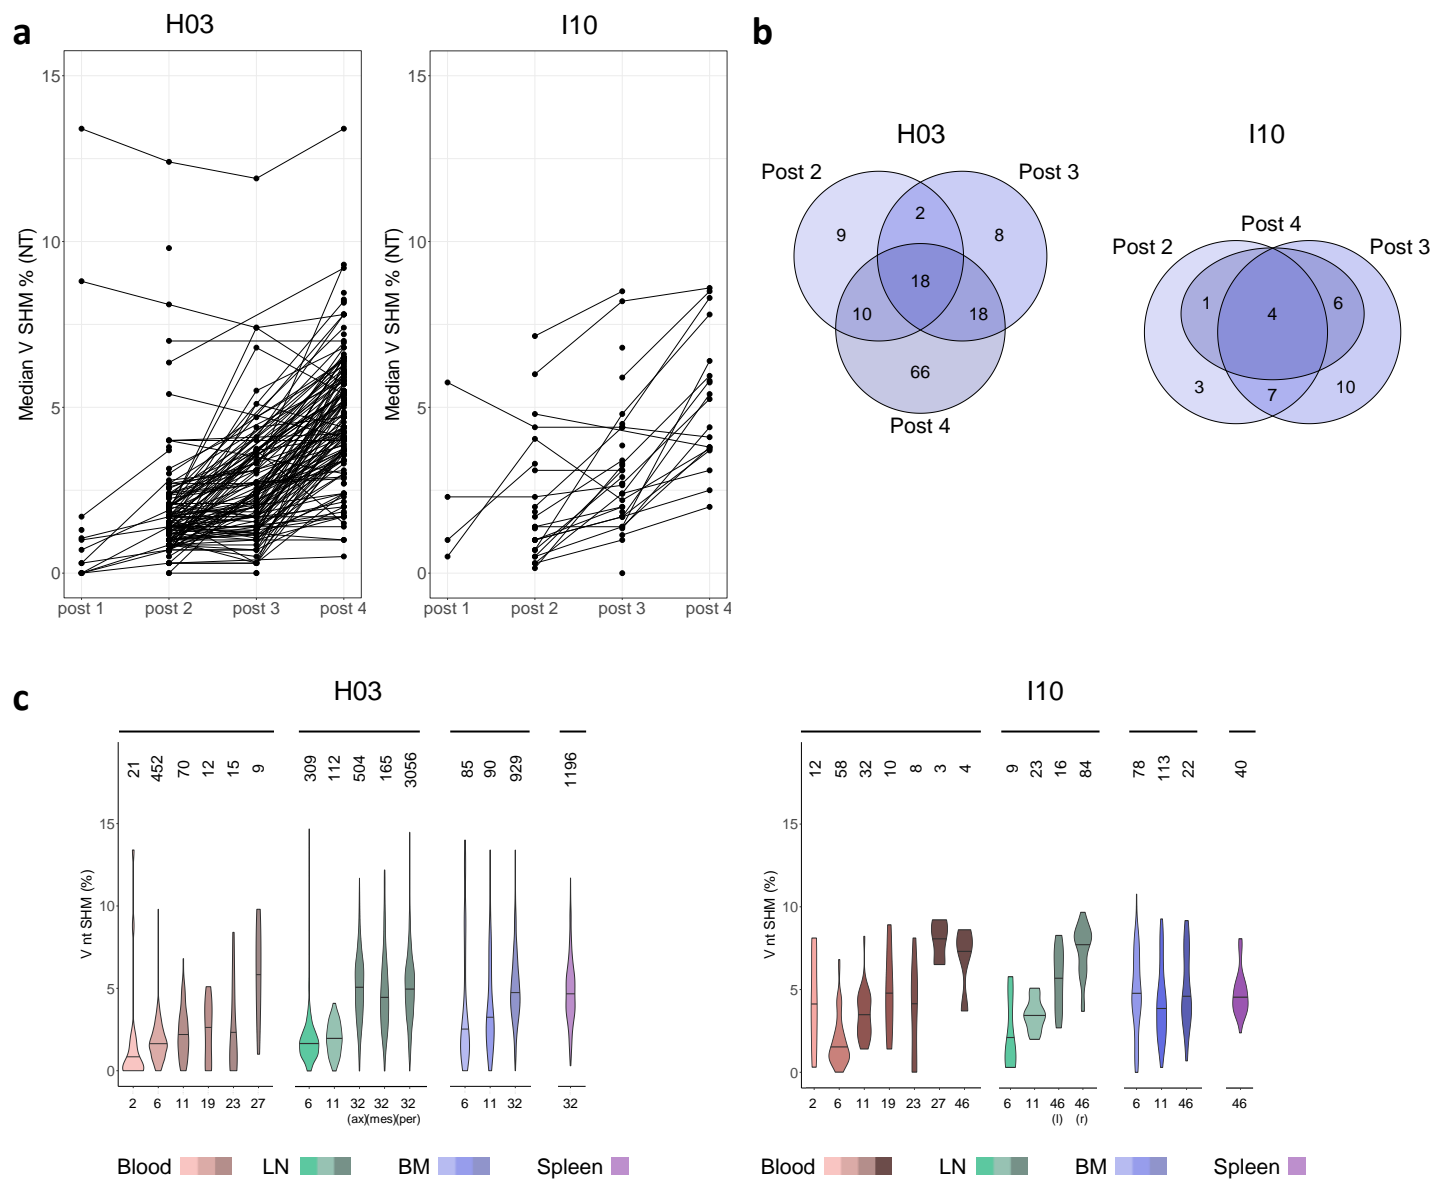

**Supplementary Fig 2. Lineage tracing summary of H03 and I10.** **a** Median *IGHV* gene SHM (% at the nucleotide level) per lineage and time point for H03 (left) and I10 (right). Source data are provided as a Source Data file. **b** Summary of repertoire overlap between BM samples collected at different immunization time points displayed as Venn diagram. The number of unique and shared lineages is displayed for H03 (left) and I10 (right). **c** SHM distribution per compartment for traced sequences. The samples are color coded with red, blue, green, and purple for blood, BM, LN, and spleen, respectively, with darker shades for increasing weeks. The number of sequences contributing to the analysis are shown over each violin plot for H03 (left) and I10 (right). Median values are represented in each plot. Source data are provided as a Source Data file.

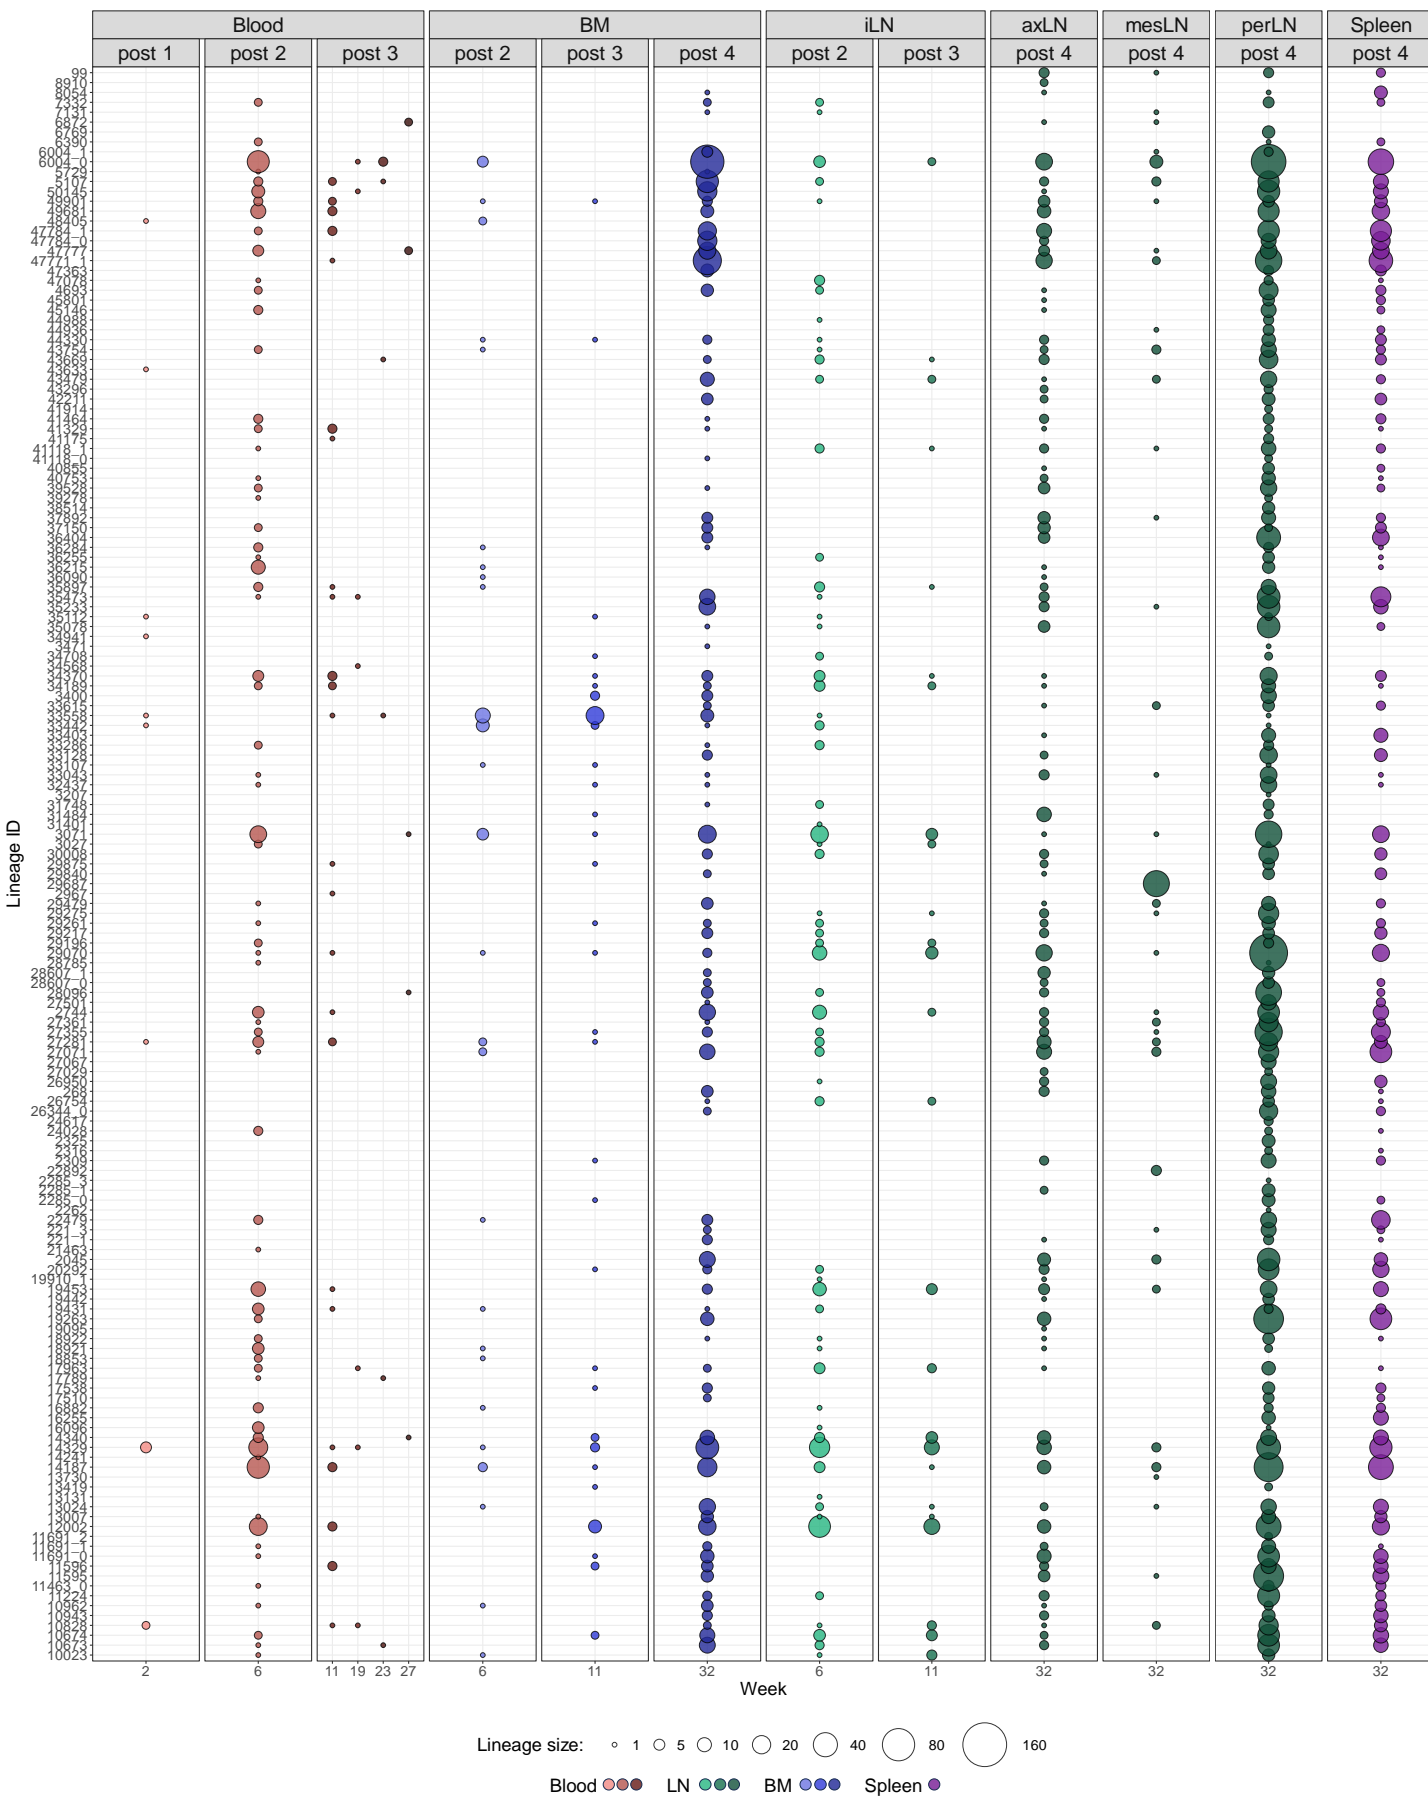

**Supplementary Fig 3. Additional H03 queried lineages traced in different immune compartments.** Dissemination of the additional queried lineages (not shown in Figure 3B) where the bubble size is directly proportional to the number of sequences identified for each lineage in each library. The x-axis of each section shows the sample compartment, grouped by time point with the sampling week indicated. Source data are provided as a Source Data file.

### Lineage 34709

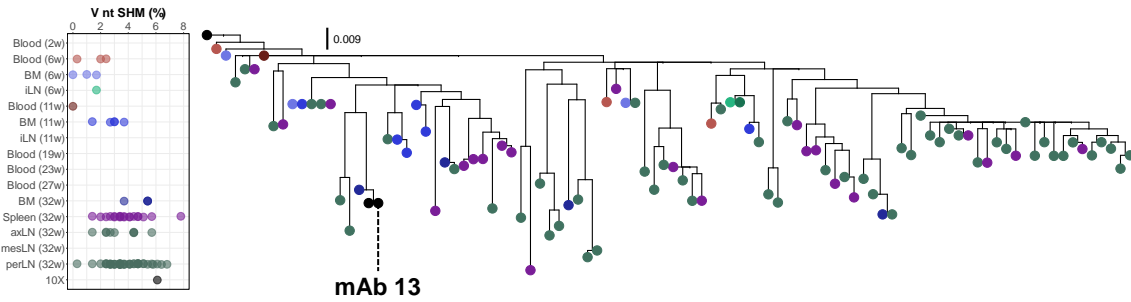

### Lineage 17512

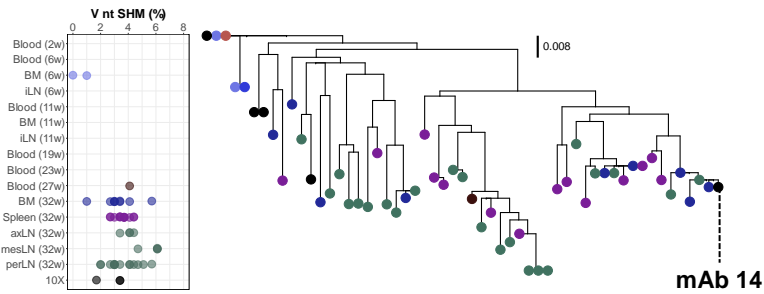

### Lineage 50667

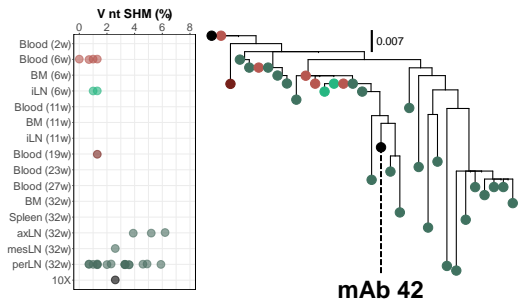

### Lineage 27358

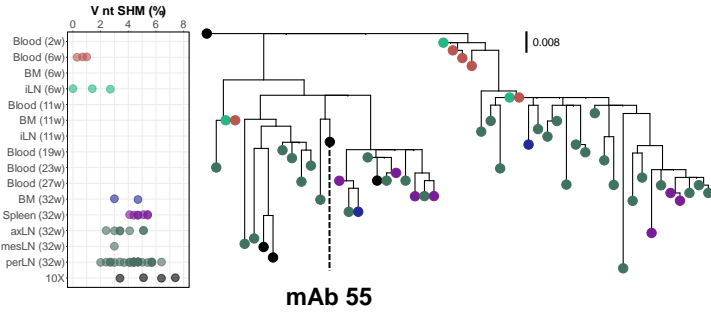

### Lineage 34715

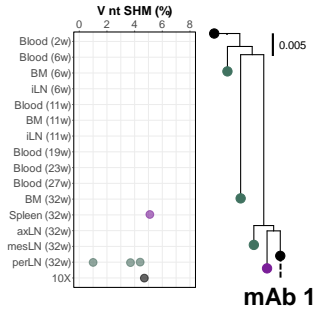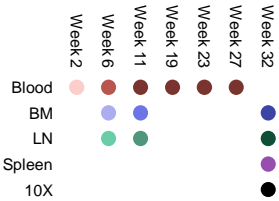

**Supplementary Fig 4. Phylogenetic trees of additional neutralizing antibodies.** Phylogenetic trees construction by maximum-likelihood of additional neutralizing mAbs. Traced members are displayed as dots colored in red, blue, green, and purple for blood, BM, LN, and spleen, respectively, with darker shades for increasing weeks. Members obtained from 10x single cell paired V(D)J sequencing are displayed as black dots. On the right side of every phylogenetic tree, a summary of V SHM of each tree's members is displayed as a dot plot following the same color scheme used in the tree. V SHM % at the nucleotide level is displayed on the x axis. Compartments of origin of each member are displayed on the y axis in temporal order.

4774 movies @0.505 Å/px

Warp 1.01:  
motion correction,  
CFT estimation  
particle picking  
fourier crop to @1.01Å  
Select <5Å, <4µm underfocus

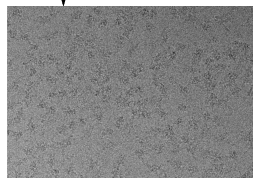

439,641 ptcls  
512 px box  
imported to cryoSPARC v3.3.2

2D classification  
Select 'good' class;  
175,843 ptcls

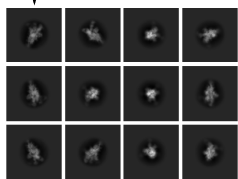

439,641 ptcls

Ab-initio (2 classes)  
4.04 Å/px

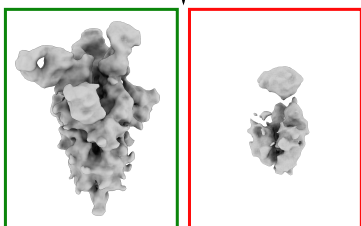

Hetero Refinement  
4.04 Å/px

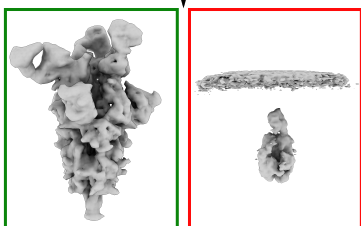

Hetero Refinement  
4.04 Å/px

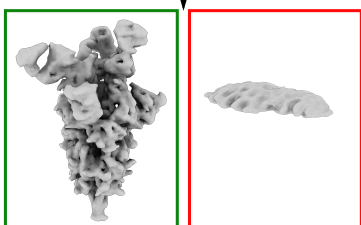

349,184 ptcls  
Homogenous Refinement  
1.01 Å/px; C1 symm

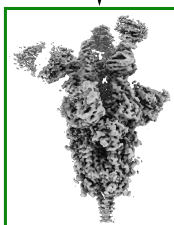

2.75Å

Non-uniform refinement  
1.01Å/px; C1 symm  
Optimize per-particle defocus  
Optimize per-group CTF params

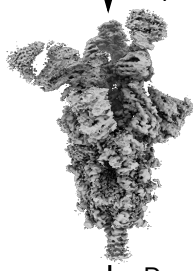

2.3Å

Downsampled  
Fourier crop to 128 px box  
4.04 Å/px; C1 symm  
Non-uniform Refinement

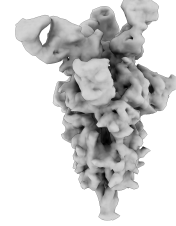

3D Variability  
No. of models to solve 4  
Filter resolution 8Å

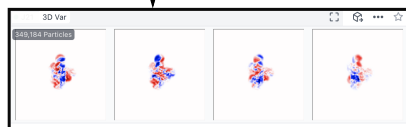

3D Variability Display  
Output mode: Cluster  
Number of clusters: 5  
Filter resolution 8Å

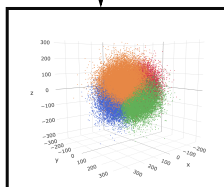

Non-uniform refinement  
(each cluster)  
4.04 Å/px

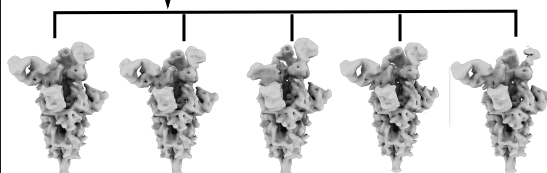

Hetero Refinement  
4.04 Å/px

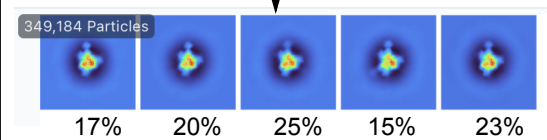

Non-uniform refinement  
1.01Å/px; C1 symm

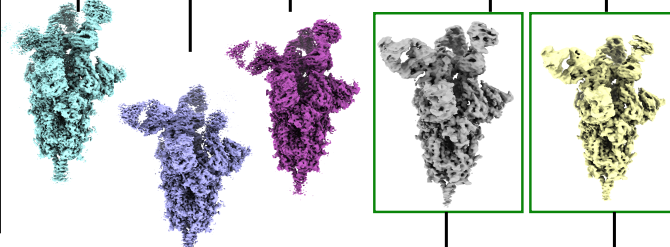

Particles combined  
Non-uniform refinement  
1.01Å/px; C1 symm  
135,612 ptcls

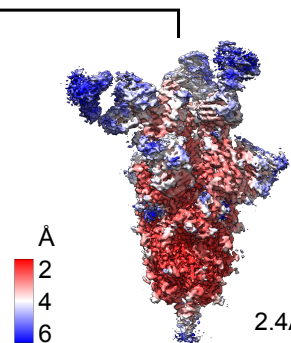

2.4Å

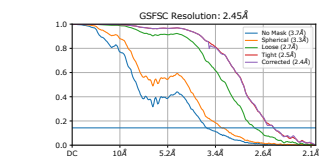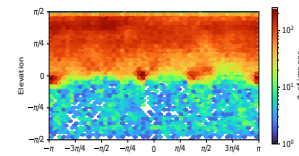

Mask creation  
(RBD-Fab)  
Particle subtraction

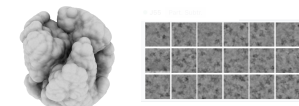

Local-refinement  
Non-uniform  
1.01 px/Å; C1 symm  
135,612 ptcls

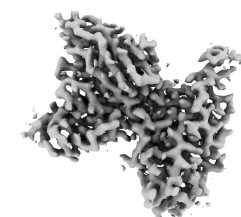

2.8Å

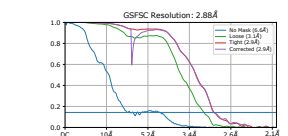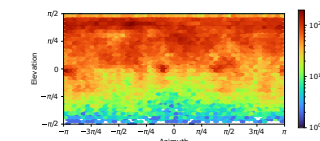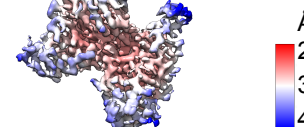

2  
3  
4

**Supplementary Fig 5. Cryo-EM processing.** Particles were picked using Warp v1.0.1 and classified using CryoSPARC v3.3.2 for downstream refinement. Local reconstruction resolution was mapped to a locally sharpened map. FSC curve and Guinier plot are calculated by CryoSPARC v3.3.2.

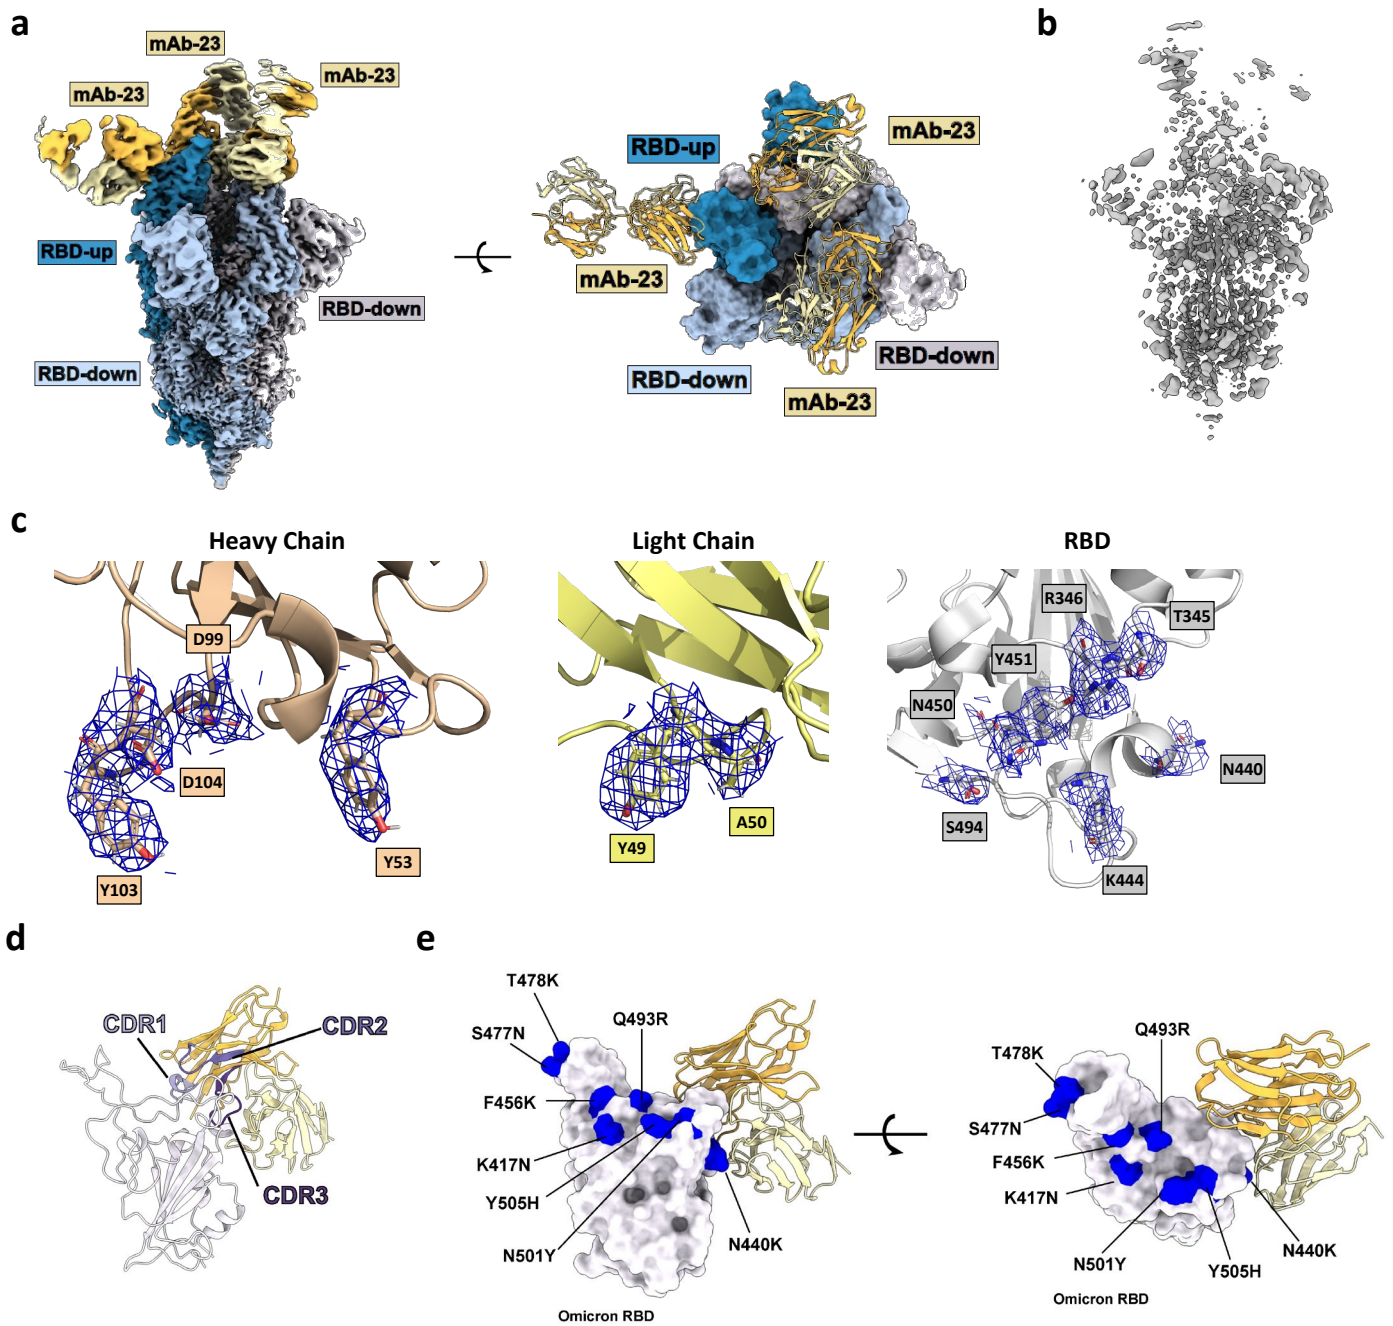

**Supplementary Fig 6. Structure of mAb 23 in complex with the SARS-CoV-2 spike.** **a** Lateral (left) and top (right) reconstruction of mAb 23 interaction with D614G-derived spike via cryo-EM. **b** Full spike-mAb 23 complex omit map, prepared with CCP-EM Servalcat, contour level: 0.000103. **c** 2Fo-Fc Map electron density map of contact residues, contoured at  $1\sigma$  (blue mesh). Heavy chain paratope in orange (left), light chain paratope in yellow (center), and RBD epitope in grey (right). **d** Highlight of mAb 23 HCDR loops. **e** Mapping of common Omicron amino acids variant positions on the SARS-CoV-2 RBD.



**Supplementary Table 1.** NHP chain specific primers for 10X based single cell cDNA synthesis and amplification.

| <b>Primer</b> | <b>Sequence</b>        | <b>Master Mix</b> |
|---------------|------------------------|-------------------|
| 10X_RM_IGHA_1 | ACGTGGCATGTCACGGACTC   | 1                 |
| 10X_RM_IGHD_1 | CTGGCTGCTTGTCGTGTAGCTG | 1                 |
| 10X_RM_IGHE_1 | TGTTGACCTCTTTGTCTGCGG  | 1                 |
| 10X_RM_IGHG_1 | TTGTCCACCTTGGTGTGCT    | 1                 |
| 10X_RM_IGHM_1 | TACTTGCCCCCTCTCAGGACT  | 1                 |
| 10X_RM_IGK_1  | GTCCTGCTCTGTGACTCTC    | 1                 |
| 10X_RM_IGL_1  | GTCTCCACTCCCGGTTGAC    | 1                 |
|               |                        |                   |
| 10X_RM_IGHA_2 | TTGCTCCAGGTCACGTTGAGTG | 2                 |
| 10X_RM_IGHD_2 | CAGGTGACAGTCACGGACTTTG | 2                 |
| 10X_RM_IGHE_2 | GGCTGGTAAGGTCATAGTGCTT | 2                 |
| 10X_RM_IGHG_2 | AGCCCTGAGGACTGTAGGA    | 2                 |
| 10X_RM_IGHM_2 | GCATTCTCACAGGAGACGAGG  | 2                 |
| 10X_RM_IGK_2  | ATTCAGCAGGCACACAACAGAG | 2                 |
| 10X_RM_IGL_2  | AGACACACTAGTGTGGCCTTG  | 2                 |

**Supplementary Table 2.** Library reads summary pre and post cleanup with FAD and Chimera detection.

| Library             | Total merged reads | Post-FAD | Post-CHIMERA | Chimeric % |
|---------------------|--------------------|----------|--------------|------------|
| H03-post1-blood     | 4692584            | 6327     | 6193         | 2.12       |
| H03-post2-BM        | 3221169            | 16594    | 16140        | 2.74       |
| H03-post2-iLN       | 3544903            | 16503    | 16098        | 2.45       |
| H03-post2-blood     | 4590184            | 7890     | 7744         | 1.85       |
| H03-post3-BM        | 5073720            | 19813    | 19240        | 2.89       |
| H03-post3-iLN       | 3067779            | 3668     | 3508         | 4.36       |
| H03-post3-blood     | 6479579            | 5329     | 5212         | 2.20       |
| H03-post3.19w-blood | 1727719            | 5000     | 4922         | 1.56       |
| H03-post3.23w-blood | 2567793            | 7734     | 7604         | 1.68       |
| H03-post3.27w-blood | 3738908            | 7009     | 6899         | 1.57       |
| H03-post4-BM        | 4186761            | 13153    | 11465        | 12.83      |
| H03-post4-axLN      | 1954733            | 7930     | 7703         | 2.86       |
| H03-post4-mesLN     | 1077148            | 16044    | 15683        | 2.25       |
| H03-post4-perLN     | 1472563            | 8607     | 8428         | 2.08       |
| H03-post4-spleen    | 1435711            | 4560     | 4054         | 11.10      |
| I10-post1-blood     | 4533604            | 9903     | 9655         | 2.50       |
| I10-post2-BM        | 3008350            | 63569    | 61523        | 3.22       |
| I10-post2-iLN       | 4457238            | 11514    | 11038        | 4.13       |
| I10-post2-blood     | 4847225            | 4527     | 4390         | 3.03       |
| I10-post3-BM        | 4397414            | 39471    | 38091        | 3.50       |
| I10-post3-iLN       | 5273030            | 9804     | 9463         | 3.48       |
| I10-post3-blood     | 4639468            | 6200     | 6049         | 2.44       |
| I10-post3.19w-blood | 2322594            | 4506     | 4406         | 2.22       |
| I10-post3.23w-blood | 2005041            | 4964     | 4851         | 2.28       |
| I10-post3.27w-blood | 2370272            | 4550     | 4408         | 3.12       |
| I10-post4-BM        | 2652688            | 10120    | 9824         | 2.92       |
| I10-post4-iLN-L     | 2309079            | 4416     | 4322         | 2.13       |
| I10-post4-iLN-R     | 4159311            | 9604     | 9400         | 2.12       |
| I10-post4-spleen    | 2580445            | 6243     | 6020         | 3.57       |
| I10-post4-blood     | 1849560            | 5826     | 5666         | 2.75       |

**Supplementary Table 3:** Cryo-EM data collection, refinement, and validation statistics

|                                                        | <b>SARS-CoV-2 Spike + Fab mAb 23</b><br>(EMDB: 18180)<br>(PDB: 8Q5Y) | <b>RBD + Fab mAb 23</b><br>(EMDB: 17451)<br>(PDB: 8P5M) |
|--------------------------------------------------------|----------------------------------------------------------------------|---------------------------------------------------------|
| <b>Data collection and processing</b>                  |                                                                      |                                                         |
| <b>Magnification (nominal)</b>                         | 165,000                                                              |                                                         |
| <b>Voltage (kV)</b>                                    | 300                                                                  |                                                         |
| <b>Electron exposure (e<sup>-</sup>/Å<sup>2</sup>)</b> | 54.6                                                                 |                                                         |
| <b>Underfocus range (μm)</b>                           | 0.3–2                                                                |                                                         |
| <b>Pixel size (Å)</b>                                  | 0.505                                                                |                                                         |
| <b>Symmetry imposed</b>                                | C1                                                                   |                                                         |
| <b>Initial particle images (no.)</b>                   | 439,641                                                              |                                                         |
| <b>Final particle images (no.)</b>                     | 135,612                                                              | 135,612                                                 |
| <b>Map resolution (Å)</b>                              | 2.45                                                                 | 2.88                                                    |
| FSC threshold                                          | 0.143                                                                | 0.143                                                   |
| <b>Refinement</b>                                      |                                                                      |                                                         |
| <b>Initial model used (PDB code)</b>                   | 7A25                                                                 | 7A25                                                    |
| <b>Map sharpening B factor (Å<sup>2</sup>)</b>         | 107.1                                                                | 142.0                                                   |
| <b>Model composition</b>                               |                                                                      |                                                         |
| Non-hydrogen atoms                                     | 30930                                                                | 3260                                                    |
| Protein residues                                       | 3873                                                                 | 419                                                     |
| Ligands                                                | 52 NAG                                                               | 1 NAG                                                   |
| <b>B factors (Å<sup>2</sup>)</b>                       |                                                                      |                                                         |
| Protein                                                | 80.67                                                                | 84.9                                                    |
| Ligand                                                 | 104.08                                                               | -                                                       |
| <b>R.m.s. deviations</b>                               |                                                                      |                                                         |
| Bond lengths (Å)                                       | 0.007                                                                | 0.005                                                   |
| Bond angles (°)                                        | 0.678                                                                | 1.042                                                   |
| <b>Validation</b>                                      |                                                                      |                                                         |
| MolProbity score <sup>1</sup>                          | 1.47                                                                 | 1.37                                                    |
| Clashscore <sup>1</sup>                                | 8.79                                                                 | 3.60                                                    |
| Poor rotamers (%)                                      | 0.0                                                                  | 0.0                                                     |
| <b>Ramachandran plot<sup>2</sup></b>                   |                                                                      |                                                         |
| Favored (%)                                            | 98.42                                                                | 96.61                                                   |
| Allowed (%)                                            | 1.52                                                                 | 3.39                                                    |
| Disallowed (%)                                         | 0.05                                                                 | 0.0                                                     |

### Supplementary References

1. Chen, V. B. *et al.* MolProbity: All-atom structure validation for macromolecular crystallography. *Acta Crystallogr D Biol Crystallogr* (2010) doi:10.1107/S0907444909042073.
2. Ramachandran, G. N., Ramakrishnan, C. & Sasisekharan, V. Stereochemistry of polypeptide chain configurations. *J Mol Biol* **7**, 95–99 (1963).
