# Supplementary material for: Multi-compartmental diversification of neutralizing antibody lineages dissected in SARS-CoV-2 spike-immunized macaques
Source: PubMed Central journal article supplement (PMC11283548; doi:10.1038/s41467-024-50286-0), 2024-07-27
Supplement: 41467_2024_50286_MOESM3_ESM.pdf [file 41467_2024_50286_MOESM3_ESM.pdf]

## **Description of Additional Supplementary Files**

**File name:** Supplementary Data 1

**Description:** HC and LC V and J germline alleles identified with IgDiscover in H03 and I10. Both nucleotide sequences and translated amino acid sequences are reported.

**File name:** Supplementary Data 2

**Description:** Summary of single cell tracing status at paired VDJ level and lineage level.

**File name:** Supplementary Data 3

**Description:** Genetic information of spike-specific cloned mAbs.

**File name:** Supplementary Data 4

**Description:** Lineage 10644 phylogenetic tree SHM count for total VDJ sequence, V sequence and J sequence.

**File name:** Supplementary Data 5

**Description:** SARS-CoV-2 RBD amino acid variant frequencies based on Outbreak.info reports.
