# Supplementary material for: Multi-compartmental diversification of neutralizing antibody lineages dissected in SARS-CoV-2 spike-immunized macaques
Source: Nat Commun. 2024 Jul 27;15:6338. doi: 10.1038/s41467-024-50286-0 (PMC11283548; doi:10.1038/s41467-024-50286-0)
Supplement: Supplementary file 5 — Dataset 2 [file 41467_2024_50286_MOESM5_ESM.xlsx]

## Sheet: Paired VDJs summary
	Count
Total paired VDJ	1250
Total unique paired VDJ	1048
Total unique paired VDJ (after grouped per sample)	1095
Total paired VDJ assigned to H03	1048
Total paired VDJ assigned to I10	117
	H03 samples
	DLNR1	DLNR2	LNOther	Spleen
Traced paired VDJ	37	255	115	19
Non-traced paired VDJ	14	58	79	5
	I10 samples
	Blood
Traced paired VDJ	44
Non-traced paired VDJ	66
	Ambiguous
	Low counts	Unassigned
Traced paired VDJ in H03	398	68
Traced paired VDJ in I10	4	3
Non-traced paired VDJ	52	33

## Sheet: Lineage summary
	Count
Total traced lineages	232
Total lineages traced in H03	191
Total lineages traced in I10	41
	H03 samples
	DLNR1	DLNR2	LNOther	Spleen
Traced lineages	22	107	75	18
Non-traced lineages	11	40	63	3
	I10 sampes
	Blood
Traced lineages	37
Non-traced lineages	52
	Ambiguous
	Low counts	Unassigned
Traced lineages in H03	29	25
Traced lineages in I10	3	3
