# Supplementary material for: Multi-compartmental diversification of neutralizing antibody lineages dissected in SARS-CoV-2 spike-immunized macaques
Source: Nat Commun. 2024 Jul 27;15:6338. doi: 10.1038/s41467-024-50286-0 (PMC11283548; doi:10.1038/s41467-024-50286-0)
Supplement: Supplementary file 6 — Dataset 3 [file 41467_2024_50286_MOESM6_ESM.xlsx]

## Sheet: Paired VDJs summary
mAb ID	Characterization	Lineage ID	Barcode	IGHV	IGHD	IGHJ	HVDJ (NT)	HVDJ (AA)	HCDR3 (NT)	HCDR3 (AA)	IGHV SHM % (NT)	IGLV	IGLJ	LVDJ (NT)	LVDJ (AA)	LCDR3 (NT)	LCDR3 (AA)	IGHLV SHM % (NT)
1	neut	34715	ACGGGTCCATGACGGA-1	IGHV4-79*01_S2462	IGHD5-32*01_S0263	IGHJ4-3*01	CAGGTGCAGCTGCAGGAGTCGGGCCCAGGACTGGTGAAGCCTTCGGAGACCTTGTCCCTCACCTGCGCTGTCTCTGATGGCTCCATAAGCGATGAGTACTACTGGACCTGGATCCGCCAGCCCCCAGGGCGGGGACTGGAGTGGATTGGGTACATGTATGGCAGTGATGGGGGCACCAACTACAATCCCTCCCTCAACAATCGAGTCACCATTTCCATAGACACGTCCAAGAACCAATTCTCCCTGAACCTGAGGTCTGTGACCGCCGCGGACACGGCCGTGTATTACTGTGCGAGACGCCCCAGGAGATACAGTGGGTACCGTTACTTCTTCGGATTTGACTACTGGGGACAGGGAGTCCTGGTCACCGTTTCCTCAG	QVQLQESGPGLVKPSETLSLTCAVSDGSISDEYYWTWIRQPPGRGLEWIGYMYGSDGGTNYNPSLNNRVTISIDTSKNQFSLNLRSVTAADTAVYYCARRPRRYSGYRYFFGFDYWGQGVLVTVSS*	GCGAGACGCCCCAGGAGATACAGTGGGTACCGTTACTTCTTCGGATTTGACTAC	ARRPRRYSGYRYFFGFDY	4.7	IGLV3-40*01_kim	IGLJ3*01	TCCTATGAGCTGACTCAGGCACCCTCGGTGTCGGTGTCCCCAGGACAGACGGCCAGGATCACCTGTGGGGGAGACAGCATTGGAAGTAAAAATGTGCAGTGGTACCAGCAGAGGCCAGCGCAGGCCCCTGTATTGGTCATCTTAGATGATACCGAACGGACCTCAGGAATCCCTGAGCGATTCTCTGGCTCCAACTCAGGGAACACCGCCACCCTGACCATCAGCGGGGTCGAGGCCGGGGATGAGGCTGACTATTACTGTCAGGTGTGGGATAGTCGTAGTGATCATGTGTTATTCGGAGGAGGGACCCGGCTGACCGTCCTAG	SYELTQAPSVSVSPGQTARITCGGDSIGSKNVQWYQQRPAQAPVLVILDDTERTSGIPERFSGSNSGNTATLTISGVEAGDEADYYCQVWDSRSDHVLFGGGTRLTVL	CAGGTGTGGGATAGTCGTAGTGATCATGTGTTA	QVWDSRSDHVL	6.2
5	S	25351	AGAGCTTAGAACAATC-1	IGHV4-117*01	IGHD3-41*01	IGHJ4-3*01	CAGCTGCAGCTGCAGGAGTCGGGCCCAGGACTGGTGAAGCCTTCGGAGACCCTGTCCCTCACCTGCGCTGTCTCTGGTGGCTCCATCAGCAGTAACTACTGGAGCTGGATCCGCCAGCCCCCAGGGAAGGGACTGGAGTGGATTGGACGTATTTCTGGTAGTGGTGGGAGCACCGACTACAACCCCTCCCTCAAGAATCGAGTCACCATTTCAACAGACACGTCCAAGAACCAGTTCTCCCTGAAGCTGACTTCTGTGACCGCCGCGGACACGGCCGTATATTACTGTGCAAGAGAGGGATTTGGGCTTACAATACTTGGACTGTTTACCAAAGGCTACTACTTTGACTACTGGGGCCAGGGAGTCCTGGTCACCGTCTCCTCAG	QLQLQESGPGLVKPSETLSLTCAVSGGSISSNYWSWIRQPPGKGLEWIGRISGSGGSTDYNPSLKNRVTISTDTSKNQFSLKLTSVTAADTAVYYCAREGFGLTILGLFTKGYYFDYWGQGVLVTVSS*	GCAAGAGAGGGATTTGGGCTTACAATACTTGGACTGTTTACCAAAGGCTACTACTTTGACTAC	AREGFGLTILGLFTKGYYFDY	2	IGLV1-65*01_S2037	IGLJ2*01	CAGTCTGTGCTGACACAGCCGCCCTCAGTGTCTGGGGCCCCAGGGCAGAGGGTCACCATCTCGTGCACTGGGAGCAGCTCCAATATTGGAGGTTATGATGTACACTGGTACCAGCGGCTCCCAGGAACGGCCCCCAAACTCCTCATCTATGACAATACTAAGCGACCCTCAGGGATTTCTGACCGATTCTCTGGCTCCAAGTCTGGTACCTCAGCCTCCCTGGCCATCACTGGGCTCCAGACTGAGGATGAGGCTGATTATTACTGCCAGTCCTATGACAGCAGCCTGAATGCTGTCTTATTCGGAGGAGGGACCCGGCTGACCGTCCTAG	QSVLTQPPSVSGAPGQRVTISCTGSSSNIGGYDVHWYQRLPGTAPKLLIYDNTKRPSGISDRFSGSKSGTSASLAITGLQTEDEADYYCQSYDSSLNAVLFGGGTRLTVL	TCCTATGACAGCAGCCTGAATGCTGTCTTA	SYDSSLNAVL	6.5
6	RBD	24725	GTGAAGGCAGATCGGA-1	IGHV4-117*01	IGHD3-18*01	IGHJ4-3*01	CAGCTGCAGCTGCAGGAGTCGGGCCCAGGACTGGTGAGGCCTTCGGAGACCCTGTCCCTCACCTGCGCTGTCTCTGGTGCCTCCGTCAGCACTAACTACTGGAGCTGGATCCGCCAGTCCCCAGGGAAGGGGCTGGAGTGGATTGGACGAATCTTTGGTAGTGGTGGGAGTCCCGACAAGAACCCCTCCCTCAAGAGTCGAGTCACCATTTCAACAGACACGTCCAAGAATCAGTTGTCCCTGAGGCTGAGCTCTGTGACCGCCGCGGACACGGCCGTATATTACTGTGCGCTAGATGCGTATTCCTTTGGGTACTATTTTGACTCCTGGGGCCAGGGAGTCCTGGTCACCGTCTCCTCAG	QLQLQESGPGLVRPSETLSLTCAVSGASVSTNYWSWIRQSPGKGLEWIGRIFGSGGSPDKNPSLKSRVTISTDTSKNQLSLRLSSVTAADTAVYYCALDAYSFGYYFDSWGQGVLVTVSS*	GCGCTAGATGCGTATTCCTTTGGGTACTATTTTGACTCC	ALDAYSFGYYFDS	6.1	IGLV1-60*01_kim	IGLJ6*01	CAGTCTGTGCTGACTCAGCCTCCCTCAGTGTCTGAGGCCGCCAGGAAGAGTGTCACCATCTCCTGTTCTGGAAGCAGCTCCAACGTCGGAAGTAATAGTGTATCCTGGTACCAGCAGCTCCCAGGAGCAGCTCCCAAACTCCTCATCTATTATAATGATCAACGAGCCTCAGGTGTCTCTGACCGATTCTCTGGCTCCAAGTCTGGCACGTCAGCCTCCCTGGCCATCAGTGGCCTCCAGACCGAGGATGAGGCTGATTATTACTGCGCTGCATGGGATGATAGGCTGAGCGCTGATGTGTTCGGAAGTGGCACCAAGTTGACCGTCCTCG	QSVLTQPPSVSEAARKSVTISCSGSSSNVGSNSVSWYQQLPGAAPKLLIYYNDQRASGVSDRFSGSKSGTSASLAISGLQTEDEADYYCAAWDDRLSADVFGSGTKLTVL	GCTGCATGGGATGATAGGCTGAGCGCTGATGTG	AAWDDRLSADV	2.1
7	neut	21180	ACTTGTTAGTACCGGA-1	IGHV3-NL_11*01_S3736	IGHD2-14*02_S0100	IGHJ6-6*01	GAGGTGCAGCTGGTGGAAACTGGAGGAGGCTTGGTCCAGCCTGGGGGGTCCCTGAAACTCTCCTGTGCAGCCTCTGGATTCAGATTCAGTAACTATGGCATGACCTGGGTCCGCCAGGCTCCAGGGAGGGGGCTAGAGTGGGTCTCATCTATAAACAGTGGTGGGAGTAGCACATACCACGCAGACTCCGTGAAGGGCCGATTCACCATTTCCAGAGACAACTCAAAGAACACGGTCTCCCTGCAAATGGACAGCCTGAGACCTGAGGACACGGCCGTGTATTACTGTGCGAAACAGTACACGGAGATTGTGGGGGTGGTGTCTGCTCTATATTACTACACCTTGGATTCCTGGGGCCAAGGGGTCGTCGTCACCGTCTCCTCAG	EVQLVETGGGLVQPGGSLKLSCAASGFRFSNYGMTWVRQAPGRGLEWVSSINSGGSSTYHADSVKGRFTISRDNSKNTVSLQMDSLRPEDTAVYYCAKQYTEIVGVVSALYYYTLDSWGQGVVVTVSS*	GCGAAACAGTACACGGAGATTGTGGGGGTGGTGTCTGCTCTATATTACTACACCTTGGATTCC	AKQYTEIVGVVSALYYYTLDS	5.1	IGLV1-65*01_S2037	IGLJ3*01	CAGTCAGTGCTGACACAGCCGCCCTCAGTGTCTGGGGCCCCAGGGCAGACGGTCACCATCTCGTGCGCTGGGACCAGCTCCAACATTGGAGGTTATGTTGTCCACTGGTACCAACAGGTCCCAGGAACGGCCCCCAAACTCCTCATCTACGACAATAATGAGCGACCCTCAGGGATTTCTGGCCGATTCTCTGGCTCCACGTCTGGTACCTCAGCCTCCCTGGCCATCACTGGGCTCCAGACTGAGGATGAGGCTGATTATTACTGCCAGTCGTATGACATCAGCCTGAATGCTGTGTTATTCGGAGGAGGGACCCGGCTGACCGTCCTAG	QSVLTQPPSVSGAPGQTVTISCAGTSSNIGGYVVHWYQQVPGTAPKLLIYDNNERPSGISGRFSGSTSGTSASLAITGLQTEDEADYYCQSYDISLNAVLFGGGTRLTVL	TCGTATGACATCAGCCTGAATGCTGTGTTA	SYDISLNAVL	9.5
8	RBD	36405	CTCATTACAGCCTATA-1	IGHV4-93*01_S0054	IGHD3-20*01	IGHJ4-3*01	CAGGTGGAGCTGCAGGAGTCGGGCCCAGGACTGCTGAAGCCTTCGGAGACCCTGTCCCTCACCTGCGCTGTCTCTGGTTACTCCATCAGCAGTGGTTATGGCTGGAGCTGGATCCGCCAGGCCCCAGGGAAGGGACTGGAATGGATTGGGCACATCTCTTATAGCGGGAGCACCACCTACAACCCGTCCCTCAAGAGTCGACTCACCTTTTCAAGAGACACGTCCAAGAACCACCTCTCCCTAGAACTGAACTCTGTGACCGCCGCGGACACGGCCGTGTATTACTGTGCCAGAAATCACGATAGTAGTTGGTCGAACTACCTTGACTACTGGGGCCAGGGAGTCCTGGTCACCGTCTCCTCAG	QVELQESGPGLLKPSETLSLTCAVSGYSISSGYGWSWIRQAPGKGLEWIGHISYSGSTTYNPSLKSRLTFSRDTSKNHLSLELNSVTAADTAVYYCARNHDSSWSNYLDYWGQGVLVTVSS*	GCCAGAAATCACGATAGTAGTTGGTCGAACTACCTTGACTAC	ARNHDSSWSNYLDY	5.4	IGLV3-40*01_kim	IGLJ1*01	TCCTATGAGCTGACTCAGCCACCCTCGGTGTCGGTGTCCCCAGGACAGACGGCCACGATCACCTGTGGGGGAGACGACATTGGAAGTAAGAATGTGCAGTGGTACCGACAGAAGCCAGCGCAGGCCCCTGTCCTGGTCATCTATGATGATACCGAACGGCCCTCAGGGATCCCTGAGCGATTTTCTGGCTCCAACTCAGGGAACACCGCCACCCTGACCATCAGCGGGGTCGAGGCCGGGGATGAGGCTGACTATTCCTGTCAGGTGTGGGATAGTGGTCCTGTTCATTACATCTTCGGTGCTGGGACCCGGCTCTCCGTCCTAG	SYELTQPPSVSVSPGQTATITCGGDDIGSKNVQWYRQKPAQAPVLVIYDDTERPSGIPERFSGSNSGNTATLTISGVEAGDEADYSCQVWDSGPVHYIFGAGTRLSVL	CAGGTGTGGGATAGTGGTCCTGTTCATTACATC	QVWDSGPVHYI	6.9
10	S	30715	GAAACTCTCGTTTAGG-1	IGHV4-67*02	IGHD2-10*01	IGHJ5-4*02	CAGGTGCAGCTGCAGGAGTCGGGCCCAGCAGTGGTGAAGCCTTCGGAGACCCTGTCCCTCACCTGCGCTGTCTCTGGTGGCTCCATCAGCAGTAGTAACTGGTGGAGCTGGATCCGCCAGTCCCCAGGGAAGGGGCTGGAATGGATTGGGGTTATCTATGGTGTTGGTGGGAGCACCGAATACAACCCCTCCCTCAAGAGTCGAGTCACCATTTCAAAAGACACGTCCAAGAACCAGTTCTCCCTGAAGCTGAGCTCTGTGACCGCCGCGGACACCGCCGTGTATTACTGTGCGAGAGTACTTAACTGGTTCGATGTCTGGGGCCCGGGAGTCCTGGTCACCGTCTCCTCAG	QVQLQESGPAVVKPSETLSLTCAVSGGSISSSNWWSWIRQSPGKGLEWIGVIYGVGGSTEYNPSLKSRVTISKDTSKNQFSLKLSSVTAADTAVYYCARVLNWFDVWGPGVLVTVSS*	GCGAGAGTACTTAACTGGTTCGATGTC	ARVLNWFDV	1	IGLV3-NL_4*01_S2847_kim	IGLJ2*01	TCCTATGATCTGACTCAGCCACCCTCGGTGTCAGTGTCCCCAGGACAGACGGCCAGGATCACCTGTGGGGGAGACATCATTGGAAGTGAAGTTGTGAACTGGTACCAGCAGAAGCCACCGCAGGCCCCTGTGCTGGTCATCTATGCTGATAGCGAACGGCCCTCAGGGATCCCTGAGCGATTCTCTGGCTCCAAATCAGGGAACACGGCCACCCTGACCATCAGCGGGGTCGAGGCCGGGGATGAGGCTGACTATTTCTGTCAGGTGTGGGACATTAGTAGTGATCATCCTTTATTCGGAGGAGGGACCCGGCTGACCGTCCTAG	SYDLTQPPSVSVSPGQTARITCGGDIIGSEVVNWYQQKPPQAPVLVIYADSERPSGIPERFSGSKSGNTATLTISGVEAGDEADYFCQVWDISSDHPLFGGGTRLTVL	CAGGTGTGGGACATTAGTAGTGATCATCCTTTA	QVWDISSDHPL	0.7
11	RBD	36405	AGGGATGAGGGTGTGT-1	IGHV4-93*01_S0054	IGHD6-34*01	IGHJ4-3*01	CAGGTGCAGCTGCAGGAGTCGGGCCCAGGACTGGTGAAGCCTTCGGAGACCCTGTCTCTCACCTGCGCTGTCTCTGGTTACTCCATCAGCAGTGGTTATGGCTGGAGCTGGATCCGCCAGTCCCCAGGGAAGGGACTGGAGTGGATTGGCTACATCTCTTATGGTGGGAGCACCACCTACAAGCCGTCCCTCAAGAGTCGAGTCACCATTTCAAGAGACACGTCCAAGAACCAGATCTCCCTGAACCTGAATTCTGTGACCGCCGCGGACACGGCCGTGTATTACTGTGCGAGAAATAAGGATGACAGCTGGTCGAACTACTTTGACTACTGGGGCCAGGGAGTCCTGGTCACCGTCTCCTCAG	QVQLQESGPGLVKPSETLSLTCAVSGYSISSGYGWSWIRQSPGKGLEWIGYISYGGSTTYKPSLKSRVTISRDTSKNQISLNLNSVTAADTAVYYCARNKDDSWSNYFDYWGQGVLVTVSS*	GCGAGAAATAAGGATGACAGCTGGTCGAACTACTTTGACTAC	ARNKDDSWSNYFDY	3.4	IGLV3-40*01_kim	IGLJ1*01	TCCTATGAGCTGACTCAGCCACCCTCGGTGTCGGTGTCCCCAGGACAGACGGCCAGGACCACCTGTAAGGGAGACGACATTGGAAGTAAAAATGTGCAGTGGTACCAGCAGAAGCCACCGCAGGCCCCTGTACTGGTCATCTATGATGACACCGAACGGCCCTCAGGGATCCCTGAGCGATTCTCTGGCTCCAACTCAGGGACCACCGCCACCCTGACCATCAGCGGGGTCGAGGCCGGGGATGAGGCTGACTATTTCTGTCAGGTGTGGGATAGTAGTGGTGATCATTACATCTTCGGTGGTGGGACCCGGCTCACCGTCCTAG	SYELTQPPSVSVSPGQTARTTCKGDDIGSKNVQWYQQKPPQAPVLVIYDDTERPSGIPERFSGSNSGTTATLTISGVEAGDEADYFCQVWDSSGDHYIFGGGTRLTVL	CAGGTGTGGGATAGTAGTGGTGATCATTACATC	QVWDSSGDHYI	5.6
13	neut	34709	ACGTCAAGTGTCAATC-1	IGHV4-79*01_S2462	IGHD5-27*01	IGHJ4-3*01	CAGGTGCAGCTGCAGGAGTCGGGCCCAGGTCTGGTGAAGCCTTCGGAGACCTTGTCCCTCACCTGCGGTGTCTCTGGTGGCTCCATCAGCGATGATTACTACTGGACTTGGATCCGCCAGCCCCCAGGGAAGGGACTGGAGTGGATTGGGTCCATCTATGGTAGTGGTGGGGGCACCCACTACAATCCCTCCCACGAGATTCGGGTCACCATTTCAAGAGACACGTCCAACAACAACTTCTCCCTGAAGCTGACCTCTGTGACCGCCGCGGACACGGCCGTATACTATTGTGCGAGGGCCCGGTTGAGGACTGGATTCAGTTCGCGCCCCAACGAATTTGACTACTGGGGCCAGGGAGTCCTGGTCACCGTCTCCTCAG	QVQLQESGPGLVKPSETLSLTCGVSGGSISDDYYWTWIRQPPGKGLEWIGSIYGSGGGTHYNPSHEIRVTISRDTSNNNFSLKLTSVTAADTAVYYCARARLRTGFSSRPNEFDYWGQGVLVTVSS*	GCGAGGGCCCGGTTGAGGACTGGATTCAGTTCGCGCCCCAACGAATTTGACTAC	ARARLRTGFSSRPNEFDY	6.1	IGLV3S11*01_S1234_kim	IGLJ3*01	TCCTCTGGGCTGACTCAGGAGCCTGCATTGTCTGTGGCCTTGGGACATACAGTCACGATGACCTGCCAAGGAGACAGCCTCAAAACCTTTTATGCAAACTGGTACCAGCTGAAGCCAGGCCAGGTCCCTGTATTGGTCATGTATGGTACCACCATTAGGCCCTCAGGGATCCCAGGCCGATTCTCTGGCTCCTGGTCAGGAAACACAGGTTCCTTGACCATCACTGGGGCTCAGGTGGAAGATGAGGCTGACTATTATTGTGGCTCCTGGGATAATGATGGTAACCATCCGTTATTCGGAGGAGGGACCCGGCTGACCGTCCTAG	SSGLTQEPALSVALGHTVTMTCQGDSLKTFYANWYQLKPGQVPVLVMYGTTIRPSGIPGRFSGSWSGNTGSLTITGAQVEDEADYYCGSWDNDGNHPLFGGGTRLTVL	TCCTGGGATAATGATGGTAACCATCCGTTA	SWDNDGNHPL	4.5
14	neut	17512	GGATTACTCTGATACG-1	IGHV3-94*01_S8869	IGHD1-2*01	IGHJ6-6*01	GAGGTGCAGCTGGTGGAGTCTGGGGGCGGCTTGGCAAAGCCTGGGAGGTCCCTGAGACTCTCCTGTGTAGCCTCTGGATTCACCTTCAGTGACTACAACATCCACTGGGTCCGCCAGGCTCCAGGGAAGGGGCTGGAGTGGGTCTCAGGTATTAGTTATACTGGTGATACCACATACTATGCAGACTCCGTGAAGGGCAGATTCACCATCTCCAGAGACAACGCCAAGAACACACTGTTTCTTCAAATGGACAGCCTGAGACCTGAGGACACGTCTGTCTATTACTGTGCGAGAGATGCCTACAGGTCGCCGAAGATGATAACTGGTTTCTATCACAGGACTTACGGTTTTGATTCCTGGGGCCAAGGGGTCGCCGTCACCGTCTCCTCAG	EVQLVESGGGLAKPGRSLRLSCVASGFTFSDYNIHWVRQAPGKGLEWVSGISYTGDTTYYADSVKGRFTISRDNAKNTLFLQMDSLRPEDTSVYYCARDAYRSPKMITGFYHRTYGFDSWGQGVAVTVSS*	GCGAGAGATGCCTACAGGTCGCCGAAGATGATAACTGGTTTCTATCACAGGACTTACGGTTTTGATTCC	ARDAYRSPKMITGFYHRTYGFDS	3.4	IGLV3-40*01_kim	IGLJ2*01	TCCTATGAGCTGACTCAGGCACCCTCAGTGTCCGTGTCCCCAGGACAGACGGCCAGGATCACCTGTGGGGGCGACAACATTGGAAGTAAAAGTGTGCAGTGGTACCAGCAGAAGCCACCGCAGGCCCCTATGCTGGTCATCTATGCTGATTACGAGCGGCCCTCAGGGATCCCTGAGCGATTCTCTGGCTCCAACTCAGGGAACACCGCCACCCTGACCATCAACGGGGTCGAGGCCGGGGATGAGGCTGACTATTACTGTCAGGTGTGGGACAGTAGTAATGATGTCTTGTTCGGAGGAGGGACCCGGCTGACCGTCCTAG	SYELTQAPSVSVSPGQTARITCGGDNIGSKSVQWYQQKPPQAPMLVIYADYERPSGIPERFSGSNSGNTATLTINGVEAGDEADYYCQVWDSSNDVLFGGGTRLTVL	CAGGTGTGGGACAGTAGTAATGATGTCTTG	QVWDSSNDVL	3.2
16	S	32199	ATCTACTTCAGCAACT-1	IGHV4-79*01	IGHD3-18*01	IGHJ4-3*01	CAGGTGCAGCTGCAGGAGTCGGGCCCAGGACTGGTGAAGCCTTCGGAGACCCTGTCCCTCACCTGCGCTGTCTCTGGTGGCTCCATCAGCGATGATTACTACTGGAGCTGGATCCGCCAGCCCCCAGGGAAGGGACTGGAGTGGATTGGGTACATCTATGGTAGTGGTGGGGGCACCAACTACAATCCCTCCCTCAAGAATCGAGTCACCATTTCAATAGACACGTCCAAGAACCAGTTCTCCCTGAAACTGAGCTCTGTGACCGCCGCGGACACGGCCGTGTATTTCTGTGCGAGAGCGTATTACTATGGTAGTGGTTATTACAGAGATTGGGGCCAGGGAGTCCTGGTCACCGTCTCCTCAG	QVQLQESGPGLVKPSETLSLTCAVSGGSISDDYYWSWIRQPPGKGLEWIGYIYGSGGGTNYNPSLKNRVTISIDTSKNQFSLKLSSVTAADTAVYFCARAYYYGSGYYRDWGQGVLVTVSS*	GCGAGAGCGTATTACTATGGTAGTGGTTATTACAGAGAT	ARAYYYGSGYYRD	0.7	IGKV1-NL_12*01_kim	IGKJ3*01	GACATTCAGATGACCCAGTCTCCATCCTCCCTGTCTGCTTCTGTAGGAGACAGAGTCACCATCACTTGCCGGGCAAGTCAGGGCATTACCAGTTATTTGATTTGGTATCAGCAGAAACCGGGGAAAGCCCCTAAGCTCCTGATGTATAATGCAAACCGTTTGGAAAGTGGGGCCCCATCAAGGTTCAGCGGCAGTGGATCTGGGACAGAATTCACTCTCACCATCAGCAGCCTGCAACCTGAGGATTTTGCAACTTATTATTGTCAACAGTATAATACTTTACCATTCACTTTCGGCCCCGGGACCAAACTGGATATCAAA	DIQMTQSPSSLSASVGDRVTITCRASQGITSYLIWYQQKPGKAPKLLMYNANRLESGAPSRFSGSGSGTEFTLTISSLQPEDFATYYCQQYNTLPFTFGPGTKLDIK	CAACAGTATAATACTTTACCATTCACT	QQYNTLPFT	2.8
17	S	19968	ATAGACCAGACTCGGA-1	IGHV3-NL_11*01_S3736	IGHD3-19*02_S4720	IGHJ4-3*01	GAGGTGCAGCTGGTGGAGACTGGAGGAGGCTTGGTCCAGCCGGGGGGGTCCCTGAAACTCTCCTGTGCAGTCTCCGGATTCAGCTTCAGTGACTATGGCATGAACTGGGTCCGCCAGGCTCCAGGGAAGGGGCTAGAGTGGGTCTCAGCCATTAATGGGGGTGGGGGTAGCACATATTACGCAGACTCCGTGAAGGGCCGATTCACCGTTTCCAGAGACAACTCAAAGAACACGGTCTCCCTCCAAATGAGCAGCCTGAAAGCTGAGGACACGGCCATATATTACTGTACGAAGGGTGGTCAGGGGCGGACTGATTTTGACTACTTTGACTCCTGGGGCCAGGGAGTCCTGGTCACCGTCTCTTCA	EVQLVETGGGLVQPGGSLKLSCAVSGFSFSDYGMNWVRQAPGKGLEWVSAINGGGGSTYYADSVKGRFTVSRDNSKNTVSLQMSSLKAEDTAIYYCTKGGQGRTDFDYFDSWGQGVLVTVSS	ACGAAGGGTGGTCAGGGGCGGACTGATTTTGACTACTTTGACTCC	TKGGQGRTDFDYFDS	6.8	IGKV1-38*01_S0982	IGKJ4*01_S4126_kim	GACATTCAGCTGACCCAGTCTCCATCCTCCCTGTCTGCATCTGTCGGGGACACAGTCACCATCACTTGTCGGGCGAGTCAGGGCATTAGGGCTTTCTTAGCCTGGTATCAGCAGAAATCAGGGAAAGCCCCTAAGCTCCTAATCTACGATGCAACCAATTTACAGAATGGGGTCCCATCAAGGTTCAGCGGCGGTGGATCTGGGACAGAATTCACTCTCAGAATCAGCAGCCTGCAGCCTGAGGATTTTGCCACTTATTACTGTCAACAGCGTTTCAGTCGCCCGCTCACTTTCGGCGGAGGGACCAAGGTGGAGCTCAAAC	DIQLTQSPSSLSASVGDTVTITCRASQGIRAFLAWYQQKSGKAPKLLIYDATNLQNGVPSRFSGGGSGTEFTLRISSLQPEDFATYYCQQRFSRPLTFGGGTKVELK	CAACAGCGTTTCAGTCGCCCGCTCACT	QQRFSRPLT	8.8
18	S	1980	GTAACGTGTGCACCAC-1	IGHV1-NL_1*01_S2052	IGHD7-40*01	IGHJ5-4*03	CAGGTCCAGTTGGTGCAATCCGGGGCTGAGGTGAAGCAGCCTGGGGCCTCAGTGAAGCTCTCCTGCAAGGCTTCCGGTTATGCTTTTACCACCGCCAGTATAAGCTGGGTGCGACAGGCCCCTGGACAAGGACCTGAGTGGATGGGATGGATTATCCCTGCCAATGGTGACACAGGCAGCCCACAGAAGTTCCAGGGCAGAGTCACCATGACCAGGGACACGTCCACGAGTACAGCCTACATGGAACTGAGCGACCTGAGATCTGAGGACACGGCCGTATATTATTGTGTAAGAGGCTTTAATCAACTGGGGCGGTTCGATGTCTGGGGCCCGGGAGTCCTGGTCACCGTCTCCTCAG	QVQLVQSGAEVKQPGASVKLSCKASGYAFTTASISWVRQAPGQGPEWMGWIIPANGDTGSPQKFQGRVTMTRDTSTSTAYMELSDLRSEDTAVYYCVRGFNQLGRFDVWGPGVLVTVSS*	GTAAGAGGCTTTAATCAACTGGGGCGGTTCGATGTC	VRGFNQLGRFDV	7.8	IGKV1-66*01_S1426_kim	IGKJ3*01	GACATCCAGATGACGCAGTCTCCATCCTCCCTGTCTGCATCTGTGGGAGACAGAGTCACCATCACTTGCCGGCCGAGTCAGGGCATTAACAATTATTTAATGTGGTATCAGCAAAAACCAGGGCAAGCCCCTAAGCCCCTGATCTATTATGCGTCCAGTTTGCAAGCAGGGGTGCCATCAAGATTCAGTGGAAGTCGATCTGGGACAGATTATACTCTCACCATCAGCAGTCTGCAGCCTGAAGATATTGCGACATATTACTGTCAACAGTATGATAATTCTCCATTCACTTTCGGCCCCGGGACCAAACTGGATTTCAAAC	DIQMTQSPSSLSASVGDRVTITCRPSQGINNYLMWYQQKPGQAPKPLIYYASSLQAGVPSRFSGSRSGTDYTLTISSLQPEDIATYYCQQYDNSPFTFGPGTKLDFK	CAACAGTATGATAATTCTCCATTCACT	QQYDNSPFT	5.3
20	S	14776	TCGGGACAGCTAGCCC-1	IGHV3-76*02_S4190	IGHD4-25*01	IGHJ4-3*01	GAGGTGCAGCTGGTGGAGTCTGGGGGCGGCTTGGCAAAGCCTGGGGGATCCCTGAGACTCTCCTGTGCAGCCTCTGGATTCACCTTCAGTAACTATGCTATGCACTGGGTCCGCCAGGCTCCAGGGAAGGGGCTGGAGTGGGTCTCAGCTATTAGTAGTGGTGGTAGCACATTCTACGCAGACTCCGTGAAGGGCCGATTCACCATCTCCAGAGACAACTCAAAGAACACGCTCTCCCTGCAATTGAACAGCCTGAGAGCTGAGGACACGGCCGTGTATTACTGTGCGAAAGGAAGGCAGTTCTACGGTAACACCCCCCCTCTTGACTACTGGGGCCAGGGAGTCCTGGTCACCGTCTCCTCAG	EVQLVESGGGLAKPGGSLRLSCAASGFTFSNYAMHWVRQAPGKGLEWVSAISSGGSTFYADSVKGRFTISRDNSKNTLSLQLNSLRAEDTAVYYCAKGRQFYGNTPPLDYWGQGVLVTVSS*	GCGAAAGGAAGGCAGTTCTACGGTAACACCCCCCCTCTTGACTAC	AKGRQFYGNTPPLDY	1	IGKV1-22*01_S6268_kim	IGKJ1*01	GACATCCAGATGACCCAGTCTCCATCCTCCCTGTCTGCATCTGTAGGAGACACAGTCACCATCACTTGCCGGGCGAGTCAGAGTATTAGCAGCTGGTTAGACTGGTATCAGCAGAAACCAGGGAAAGCCCCTAAGCTCCTGATCTATAAGGCATCCAGTTTGCAAAGTGGGGTCCCATCAAGGTTCAGCGGCAGTGGATCTGGGACAGATTTCACTCTCACCATCAGCAGCCTGCAGCCTGAAGATTTTGCAACTTATTACTGTCTACAATATAACAGTAGCCCGTGGACGTTCGGCCAAGGGACCAAGGTGGAAATCAAAC	DIQMTQSPSSLSASVGDTVTITCRASQSISSWLDWYQQKPGKAPKLLIYKASSLQSGVPSRFSGSGSGTDFTLTISSLQPEDFATYYCLQYNSSPWTFGQGTKVEIK	CTACAATATAACAGTAGCCCGTGGACG	LQYNSSPWT	0.7
21	neut	25287	AACTCAGTCTCTTATG-1	IGHV4-117*01	IGHD6-33*01	IGHJ4-3*01	CAGCTGCAGCTGCAGGAGTCGGGCCCAGGACTGGTGAAGCCTTCGGAGACCCTGTCCCTCACCTGCGCTGTCTCTGGTGGCTCCATCACCAATAACTACTGGACCTGGATCCGCCAGGCCCCAGGGAAGGGACTGGAGTGGATTGGACGTATCTCTGGTAGTGGTGGGAGCACCGACTACAACCCCTCCCTCAAGAGTCGAGTCACCATTTCAACAGACACGTCCAAGAACCAGTTCTCCCTGAAGCTGACCTCCCTGACCGCCGCGGACACGGCCGTGTATTTCTGTGCGACTTTTACTTCGTACAGCGGCTGGTCCCGGTCTTTGGATGGTCCGAAGGACTACTGGGGCCAGGGAGTCCTGGTCATCGTCTCCTCAG	QLQLQESGPGLVKPSETLSLTCAVSGGSITNNYWTWIRQAPGKGLEWIGRISGSGGSTDYNPSLKSRVTISTDTSKNQFSLKLTSLTAADTAVYFCATFTSYSGWSRSLDGPKDYWGQGVLVIVSS*	GCGACTTTTACTTCGTACAGCGGCTGGTCCCGGTCTTTGGATGGTCCGAAGGACTAC	ATFTSYSGWSRSLDGPKDY	2.7	IGKV1-32*03_S8344_kim	IGKJ3*01	GACATTCAGATGTCCCAGTCTCCATCCTCCCTGTCTGCTTCTGTAGGAGACAGCGTCACCGTCTCTTGCCGGGCAAGTCAGGACATCAGCAAAGCTTTAGCCTGGTATCAACAAAAACCAGGAAAAGCCCCTAAACTCCTCATCTATTATACAGACAATTTGCCAAGTGGGGTCCCATCAAGGTTCAGCGGCAGTGGATCTGGGACGGATTACACTCTCACCATCAGCAGCCTGCAGCCTGAAGATTTTGCAACTTATTACTGTCAGCAGGTTTACAGTACCCCATTCACTTTCGGCCCCGGGACCAAAGTGGATATCA	DIQMSQSPSSLSASVGDSVTVSCRASQDISKALAWYQQKPGKAPKLLIYYTDNLPSGVPSRFSGSGSGTDYTLTISSLQPEDFATYYCQQVYSTPFTFGPGTKVDI	CAGCAGGTTTACAGTACCCCATTCACT	QQVYSTPFT	6
22	S	20738_0	CGCCAAGAGCATGGCA-1	IGHV3-NL_11*01_S3736	IGHD1-4*01	IGHJ5-4*03	GAAGTGCAGCTGGTGGAGACTGGAGGAGGCTTGGTCCAGCCTGGGGGGTCCCTGAAACTCTCCTGTGAAGGCTCTGGATTCACCTTCACTTACTATGGCATGAACTGGATCCGCCAGCCTCCAGGGAAGGGGCTAGAGTGGGTCTCATCTATTAGTCCTATTGAACATAACACATACTACGCAGACGCCGTGAAGGGCCGGTTCACCATCTCCAGAGACACCTCAAAGAACACGCTCTCCCTGCAAATGGACAGCCTGAGACCTGAGGACACGGCCGTATATTACTGTGCGAAAAGTTCGGAACAATTCTGGCGGTTCGATGTCTGGGGCCCGGGAGTCCTGGTCACCGTCTCCACAG	EVQLVETGGGLVQPGGSLKLSCEGSGFTFTYYGMNWIRQPPGKGLEWVSSISPIEHNTYYADAVKGRFTISRDTSKNTLSLQMDSLRPEDTAVYYCAKSSEQFWRFDVWGPGVLVTVST*	GCGAAAAGTTCGGAACAATTCTGGCGGTTCGATGTC	AKSSEQFWRFDV	8.8	IGKV1-NL_12*01_S0682_kim	IGKJ4*01_S4126_kim	GACATTCAGATGACCCAGTCTCCATCCTCCCTGTCTGCTTCTGTAGGAGACAGAGTCACCATCACTTGCCGGACAAGTCAGGTCATTAACAATTATTTAAATTGGTATCAGCAGAGACCAGGGAAAGCCCCTAAGCTCCTGATCTATTATGCAAACCGTTTGGAAAGTGGGGTCCCATCAAGGTTCAGCGGCCGTGGATCTGGGACAGAATTCACTCTCACCGTCAGCAGCCTCCAACCTGTGGATTTTGCAACTTATTACTGTCAACAGTATGATACTTCACCTCCCACTTTCGGCGGAGGGACCAGGGTGGAGCTCAAAC	DIQMTQSPSSLSASVGDRVTITCRTSQVINNYLNWYQQRPGKAPKLLIYYANRLESGVPSRFSGRGSGTEFTLTVSSLQPVDFATYYCQQYDTSPPTFGGGTRVELK	CAACAGTATGATACTTCACCTCCCACT	QQYDTSPPT	3.8
23	neut	10644	AAGACCTTCTGGTGTA-1	IGHV3-50*01	IGHD1-1*01	IGHJ4-3*01	GAGGTGCAGCTGGTGGAGTCTGGAGGAGGCTTGGTTCAGCCGGGGGGTTCCCTGAGACTCTCCTGTACAGCCTCTGGATTCACCTTCAGTAACTATGGCTTCCACTGGGTCCGCCAGGCTCCAGGGAAGGGGCTGGAGTGGGTGACAATTATATCGTATGATGGAATTACGAAACACTACGCAGACTCTGTGAAGGACCGATTCACCGTCTCCAGAGACAATTCCAAGACCATGGTGTATCTGCAAATGAACAACCTGAAATTGGACGACACGGCCGTCTATTACTGTGCGAGAGATTTAGGAACCTACGATGACTCCTGGGGCCAGGGAGTCCTGGTCACCGTCTCCTCAG	EVQLVESGGGLVQPGGSLRLSCTASGFTFSNYGFHWVRQAPGKGLEWVTIISYDGITKHYADSVKDRFTVSRDNSKTMVYLQMNNLKLDDTAVYYCARDLGTYDDSWGQGVLVTVSS*	GCGAGAGATTTAGGAACCTACGATGACTCC	ARDLGTYDDS	6.1	IGKV1-NL_15*01_S8599_kim	IGKJ4*01	GATATCCAGATGACCCAGTCTCCATCTGCCTTGTCTGCATCTGTAGGAGACAGAGTCACCATCTCTTGCCGGGCAAGTCAGAACATTGATGGTTTTTTAGCTTGGTATCAGCAGAAACCAGGGAAAGCCCCTAAACTCCTGATCTACGCTGCATCCAGATTGCAGAGTGGGATTCCCTCTCGGTTCAGCGGCAGTGGATCTGGGACAGATTTCACTCTCACCATCAGCAGCCTGCAGCCTGAAGATTTTGCAGCTTATTACTGTCAACAGGTTTATAGTGCCCCTCTCACTTTCGGCGGAGGGACCAAGGTGGAGTTCAAAC	DIQMTQSPSALSASVGDRVTISCRASQNIDGFLAWYQQKPGKAPKLLIYAASRLQSGIPSRFSGSGSGTDFTLTISSLQPEDFAAYYCQQVYSAPLTFGGGTKVEFK	CAACAGGTTTATAGTGCCCCTCTCACT	QQVYSAPLT	3.5
24	S	30946	GGGTCTGGTAGTAGTA-1	IGHV4-67*02	IGHD3-17*01	IGHJ5-4*03	CAGGTGCAGCTGCAGGAGTCGGGCCCAGCAGTAGTAAAGCCTTCGGAGGCCCTGTCGCTCACTTGCGCTGTCTCTGGTGGCTCCATCAGCAGTCGTTATTGGTGGACTTGGATCCGTCAGTCCCCAGGGATGGGGCTGGAATGGATTGGCGGTTTGTATGGTAGTGGTGGAATCACCGAATACAACCCCTCCCTCAGGGGTCGAGTTACCATTTCAAAAGACACGTCCAAGAACCAGTTCTCCCTGGAGGTGAAGTCTGTGACCGCCGCGGACACCGCCGTGTATTTCTGTGCGAGATTGGCCTGGGGTGATGATTACGAGTACAACCGGTTCGATCTCTGGGGCCCGGGAGTCCTGGTCACCGTCTCCTCAG	QVQLQESGPAVVKPSEALSLTCAVSGGSISSRYWWTWIRQSPGMGLEWIGGLYGSGGITEYNPSLRGRVTISKDTSKNQFSLEVKSVTAADTAVYFCARLAWGDDYEYNRFDLWGPGVLVTVSS*	GCGAGATTGGCCTGGGGTGATGATTACGAGTACAACCGGTTCGATCTC	ARLAWGDDYEYNRFDL	8.4	IGKV2-NL_13*01_S4447_kim	IGKJ3*01	GATGTTGTGATGACTCAGTCTCCACTCTCCCTGTCCGTCACCCCTGGACAGCCGGCCTCCATCTCCTGCAGGTCTAGTCAAAGCCTTCTACACACTAATGGAAACACCTACTTGAGTTGGTATCATCACAAGCCAGGCCAACCTCCAAGGCTCCTGATTTATCAGGTTTCTAACCGGTACTCTGGGGTCCCAGACAGATTCAGCGGCAGTGGGGCAGGGACTGATTTCACACTGAAAATCAGCAGAGTGGAGCCTGAGGATGTTGGGGTTTATTACTGCGGTCAAGGTGCACACCTTCCTCCATTCACTTTCGGCCCCGGGACCAAACTGGATATCAAAC	DVVMTQSPLSLSVTPGQPASISCRSSQSLLHTNGNTYLSWYHHKPGQPPRLLIYQVSNRYSGVPDRFSGSGAGTDFTLKISRVEPEDVGVYYCGQGAHLPPFTFGPGTKLDIK	GGTCAAGGTGCACACCTTCCTCCATTCACT	GQGAHLPPFT	3
25	S	30946	GGAATAACACCCATGG-1	IGHV4-67*02	IGHD3-20*01	IGHJ5-4*03	CAGGTGCAGCTGCAGGAGTCGGGCCCAGCAGTAGTGAAGCCTTCGGGGACCCTGTCCGTCAGCTGCGTTGTCTCTGGTGGCTCCATCACCACCACTAAGTGGTGGACCTGGATCCGCCAGTCCCCGGAGAAGGGGCTGGAATGGATTGGGGGTGTCTATGGGAGTGGTGGGATCACCGAATACAACCCCTCCCTCAAGAGTAGAGTCTCCATTTCAAAAGACACGTCCAAGAACCAGTTCTCCCTGGAACTGCACTCTGTGACCGCCGCGGACACCGCCGTATATCACTGTGCGAGATTGTCCTGGGGTGACGATTACGAATACAACCGGTTCGATGTCTGGGGCCCGGGAGTCCTGGTCACCGTCTCCTCAG	QVQLQESGPAVVKPSGTLSVSCVVSGGSITTTKWWTWIRQSPEKGLEWIGGVYGSGGITEYNPSLKSRVSISKDTSKNQFSLELHSVTAADTAVYHCARLSWGDDYEYNRFDVWGPGVLVTVSS*	GCGAGATTGTCCTGGGGTGACGATTACGAATACAACCGGTTCGATGTC	ARLSWGDDYEYNRFDV	8.1	IGKV2-NL_13*01_S4447_kim	IGKJ3*01	GAAGTTGTGATGACTCAGTCTCCACTCTCCCTGCCCGTCACCCCTGGACAGCCGGCCTCCATCTCCTGCAGGTCTAGTCAAAGCCTTCTACACAGTAATGGAAACACCTACTTGAATTGGTATCACCAGAAGCCAGGCCAACCTCCAAGGCTCCTGATTTATCAGGTTTCTAACCGATTCTCTGGGGTCCCAGACAGATTCAGCGGCAGTGGGGCAGGGACAGATTTCACACTGACAATCAGCAGAGTGGAGGCTGAGGATGTTGGGGTTTATTACTGCGGGCAAGGTGCGCACCTTCCTCCATTCACTTTCGGCCCCGGGACCAAACTGGATATCAAAC	EVVMTQSPLSLPVTPGQPASISCRSSQSLLHSNGNTYLNWYHQKPGQPPRLLIYQVSNRFSGVPDRFSGSGAGTDFTLTISRVEAEDVGVYYCGQGAHLPPFTFGPGTKLDIK	GGGCAAGGTGCGCACCTTCCTCCATTCACT	GQGAHLPPFT	3
26	S	30946	CGGAGCTCACGGTAAG-1	IGHV4-67*02	IGHD3-17*01	IGHJ5-4*03	CAGGTGCAGCTGCAGGAGTCGGGCCCAGCAGTGGTGAAGCCTTCGGAGACCCTGTCCCTCACCTGCGCTGTCTCTGGTGGTTCCATCAGTAGTATTAACTGGTGGACCTGGATCCGCCAGTCCCCAAGGAAGGGACTGGAATGGATTGGGGGTATCTATGGTAGCGGTGGGATCACCGAATACAACCCCTCCCTCAAGAGTCGAGTCACCATTTCTAAAGACACGTCCAAGAACCAGTTCTCCCTGAAGGTGAAGTCAGTGACCGCCGCGGACACCGCCGTATATTACTGTGTGCGACTGGCCTGGGGTGATGATTACGAATACAACCGGTTCGATGTCTGGGGCCCGGGAGTCCAGGTCACCGTCTCCTCAG	QVQLQESGPAVVKPSETLSLTCAVSGGSISSINWWTWIRQSPRKGLEWIGGIYGSGGITEYNPSLKSRVTISKDTSKNQFSLKVKSVTAADTAVYYCVRLAWGDDYEYNRFDVWGPGVQVTVSS*	GTGCGACTGGCCTGGGGTGATGATTACGAATACAACCGGTTCGATGTC	VRLAWGDDYEYNRFDV	5.4	IGKV2-NL_13*01_S4447_kim	IGKJ3*01	GATGTTGTATTGACTCAGTCTCCACTCTCCCTGCCCATCACCCCTGGACAGCCGGCCTCCATCTCCTGCGGGTCTAGTCAAAGCCTTCTACACAGTAATGGAAACACCTACTTGAATTGGTATCAACAGAAGCCAGGCCAACCTCCAAGGCTCCTGATTTTTCAGGTTTCCAGCCGGTACTCTGGGGTCCCGGACAGATTCAGCGGCAGTGGGGCAGGGACAAATTTCACACTGAAAATCAGCAGAGTGGAGGCTGAGGATGTTGGGGTTTATTACTGCGGGCAAGGTGCACACCTTCCTCCATTCACTTTCGGCCCCGGGACCAAACTGGATATCAAAC	DVVLTQSPLSLPITPGQPASISCGSSQSLLHSNGNTYLNWYQQKPGQPPRLLIFQVSSRYSGVPDRFSGSGAGTNFTLKISRVEAEDVGVYYCGQGAHLPPFTFGPGTKLDIK	GGGCAAGGTGCACACCTTCCTCCATTCACT	GQGAHLPPFT	3.6
27	S	47771_0	CCGTACTGTTCCATGA-1	IGHV5-15*01_S3228	IGHD2-14*02_S0100	IGHJ4-3*01	GAGGTGCAGCTGGTGCAGTCTGGAGCAGAGGTGAAAAGGCCCGGGGAGTCTCTGAAGATCTCCTGTAAGACTTCTGGATACAGTTTTACCAGCTACTGGATCAGCTGGGTGCGCCAGACGCCCGGGAAAGGCCTGGAGTGGATGGGGGCGATTAATCCTAGTCTATCTGATACCAGATACAGTCCGTCCTTCCAAGGCCAGGTCACCATCTCAGCCGACAAGTCCATCACCACCGCCTCCCTACAGTGGAGCAGCCTGAAGGACTCGGACTCCGCCACGTATTACTGTGCGAAAGGGGACTATAGAGGATATACCTTTGACTACTGGGGCCAGGGAGTCCTGGTCACCGTCTCCTCAG	EVQLVQSGAEVKRPGESLKISCKTSGYSFTSYWISWVRQTPGKGLEWMGAINPSLSDTRYSPSFQGQVTISADKSITTASLQWSSLKDSDSATYYCAKGDYRGYTFDYWGQGVLVTVSS*	GCGAAAGGGGACTATAGAGGATATACCTTTGACTAC	AKGDYRGYTFDY	3.4	IGKV1-66*01_S9641_kim	IGKJ4*01_S4126_kim	GACATCCAGATGACGCAGTCTCCATCCTCCCTCTCTGCATCTGTAGGAGACAGAGTCACCATCACTTGCCGGGCGAGTCAGGGCATTAACAATTATTTAAGTTGGTATCAGCAGAAACCAGGGAAAGCCCCTAAGCGCCTGATCTATTATGCATCCAGTTTGGAAACAGGGGTCCCATCAAGGTTCAGTGGAAGTGGATCTGGGACACTTTATACTCTCACCATCAGCAGTCTGCAGCCTGAAGATATTGCAACATATTATTGTCAACAGTATGATAATTTCCCTCCCACTTTCGGCGGAGGGACCAAGGTGGAGCTCAAAC	DIQMTQSPSSLSASVGDRVTITCRASQGINNYLSWYQQKPGKAPKRLIYYASSLETGVPSRFSGSGSGTLYTLTISSLQPEDIATYYCQQYDNFPPTFGGGTKVELK	CAACAGTATGATAATTTCCCTCCCACT	QQYDNFPPT	1
28	S	20738_0	AAAGATGGTGTTGGGA-1	IGHV3-NL_11*01_S3736	IGHD1-8*01	IGHJ5-4*03	GAGGTGCAGCTGGTGGAGACTGGAGGAGGCTTGGTCCAGCCTGGGGGGTCCCTGAAACTCTCCTGTGCAGCCTCTGGACTCACCTTCAGTATCTATGGCATGAACTGGGTCCGCCAGGCTCCAGGGAAGGGGCTAGAGTGGGTCTCAAGTATTAATAGTGGTGGGGGTAGCACATACTACGCAGACTCCGTGAAGGGCCGATTCACCATCTCCAGAGACGACTCAAAGAACACGCTCTCCCTGCAAATGAACAGCCTGAGAGCTGAGGACACGGCCGTGTATTTCTGTGCGAAAAGTTCGGAGCAATTCTGGCGGTTCGATGTCTGGGGCCCGGGAGTCCTGGTCACCGTCTCCTCAG	EVQLVETGGGLVQPGGSLKLSCAASGLTFSIYGMNWVRQAPGKGLEWVSSINSGGGSTYYADSVKGRFTISRDDSKNTLSLQMNSLRAEDTAVYFCAKSSEQFWRFDVWGPGVLVTVSS*	GCGAAAAGTTCGGAGCAATTCTGGCGGTTCGATGTC	AKSSEQFWRFDV	2.4	IGKV1-NL_12*01_S0682_kim	IGKJ4*01_S4126_kim	GACATTCAGATGACCCAGTCTCCATCCTCCCTGTCTGCTTCTGTAGGAGACAGAGTCACCATCACTTGCCGGTCAAGTCAGGGCATTAACAGTTATTTAAATTGGTATCAGCAGAAACCAGGGAAAGCCCCTAAGCTCCTGATCTATTATGGAAACCGTTTGGAAAGTGGGGTCCCATCAAGGTTCAGCGGCAGTGGATCTGGGACAGAATTCACTCTCACCGTCAGCGGCCTGCAACCTGACGATTTTGCAACTTATTACTGTCAACACTATAATAGTTTCCCTCCCACTTTCGGCGGAGGGACCAAGGTGGAGCTCAAAC	DIQMTQSPSSLSASVGDRVTITCRSSQGINSYLNWYQQKPGKAPKLLIYYGNRLESGVPSRFSGSGSGTEFTLTVSGLQPDDFATYYCQHYNSFPPTFGGGTKVELK	CAACACTATAATAGTTTCCCTCCCACT	QHYNSFPPT	2.4
29	S	35905	CGTTCTGCATCCAACA-1	IGHV4-93*01_S0054	IGHD5-27*01	IGHJ4-3*01	CAGGTCCAGTTGCCGGAGTCGGGCCCACGACTGGTGAAGCCTTCGGAGACCCTGTCCCTCACCTGCGGTGTCTCTGGTGACTCCATCATCAGTGGTCATGGCTGGAGTTGGATCCGCCAGCCCCCAGGGAAGGGACTGGAGTGGATTGGGTACATTTCTTATCTTGGGAATATCGACTACAACCCGTCCCTCAAGAATCGAGTCACCCTTTCAAGAGACACATCCAAGCGCCAGTTCTCCCTGACGTTGAATTTTGTGACCGCCGCGGACACGGCCATGTATTACTGTGCGGTCCAGAGAGGTTACAGTGGCCTTGACGACTGGGGCCAGGGAGTCTTGGTCATCGTCTCTTCAG	QVQLPESGPRLVKPSETLSLTCGVSGDSIISGHGWSWIRQPPGKGLEWIGYISYLGNIDYNPSLKNRVTLSRDTSKRQFSLTLNFVTAADTAMYYCAVQRGYSGLDDWGQGVLVIVSS*	GCGGTCCAGAGAGGTTACAGTGGCCTTGACGAC	AVQRGYSGLDD	9.6	IGKV1-22*01_S6268_kim	IGKJ2*01	GACATCCAGATGACCCAGTCTCCATCCTCCCTGTCTGCATCTGTAGGAGACACAGTCACCATCACTTGCCGGGCGAGTCAGAGTATTAGTAGGTGGTTAGACTGGTATCAGCAGAAACCAGGGCAGGCCCCTAAACTCCTGATCTATAAGGCATCCATTTTGCAAACTGGGGTCCCATCAAGGTTCAGCGGCAGTGCATCTGGGACAGATTTCACTCTCACCATCACCAGCCTGCAGGCTGAAGATTTTGCAAGTTACTACTGTCTACAATATAGCAGTAGCCCGTACAGTTTTGGCCAGGGGACCAGAGTGGAGATCAAAC	DIQMTQSPSSLSASVGDTVTITCRASQSISRWLDWYQQKPGQAPKLLIYKASILQTGVPSRFSGSASGTDFTLTITSLQAEDFASYYCLQYSSSPYSFGQGTRVEIK	CTACAATATAGCAGTAGCCCGTACAGT	LQYSSSPYS	4.6
30	S	19264	ACGCCGAAGCGTTGCC-1	IGHV3-NL_11*01_S3736	IGHD6-33*01	IGHJ4-3*01	GAGGTGCAACTGCTGCAGACTGGAGGAGGCTTGGTCCAGCCTGGGAAGTCCCTGAATCTCTCCTGTGCAGCCTCTGGATTCACCTTTGGTACCTATGGCCTGACCTGGGTCCGCCAGGCTCCAGGGAAGGGACTAGAATGGGTCTCATCTATTAATACTGGTGGGACTATTACATACTACGCAGACTCCGTGAAGGGCCGATTCACCATCTCCAGCGACAACTCAAAGAACACCTTCTCCCTGCAAATGAACAGTGTGAGACCTGACGACACGGCCGTGTATTATTGTGCGGAGGGGTATAACAGCGGCCTTGACTTCTGGAGCCAGGGAGTCCTGGTCACCGTCTCCTCAG	EVQLLQTGGGLVQPGKSLNLSCAASGFTFGTYGLTWVRQAPGKGLEWVSSINTGGTITYYADSVKGRFTISSDNSKNTFSLQMNSVRPDDTAVYYCAEGYNSGLDFWSQGVLVTVSS*	GCGGAGGGGTATAACAGCGGCCTTGACTTC	AEGYNSGLDF	9.3	IGKV1-32*03_S8344_kim	IGKJ2*01	GACATTCAGATGTCCCAGTCTCCATCCTCCCTGTCTGCTTCTGTAGGAGACAGAGTCACTATCACTTGCCGGGCAAGTCAGGGCATTAGTTCTGGTTTAGCCTGGTATCAGCAGAAACCAGGGAAGGCCCCTAAACTCCTGATCTATTATGCAAACACTTTGGCAAGTGGGGTCCCATCAAGGTTCAGCGGCAGTGGATCTGGGACGGATTACACTCTCACCATCAGCAGCCTGCAGCCTGAAGATTTTGCAACTTATTACTGTCAACAGGGTTACAGTTCCCCGTTCAGTTTTGGCCAGGGGACCAAAGTGGAGATCAAAC	DIQMSQSPSSLSASVGDRVTITCRASQGISSGLAWYQQKPGKAPKLLIYYANTLASGVPSRFSGSGSGTDYTLTISSLQPEDFATYYCQQGYSSPFSFGQGTKVEIK	CAACAGGGTTACAGTTCCCCGTTCAGT	QQGYSSPFS	3.2
31	S	27741	TTTGCGCAGTGCGATG-1	IGHV4-117*01_S6342	IGHD6-33*01	IGHJ5-4*03	CAGCTGCAGCTGCAGGAGTCGGGCCCAGGACTGGTGAAGCCTTCAGAGACCCTGTCCCTCACCTGCGCTGTCTCTGGTGGCTCCATCAGTAGTAACTGGTGGAGCTGGATCCGCCAGCCCCCAGGGAAGGGACTGGAGTGGATTGGACGTATCTCTGGTAGTGGTGGGAGCACCAGCTACAACCCCTCCCTCAAGAGTCGAGTCACCATTTCAACAGACACGTCCAAGAACCAGTTCTCCCTGAAGCTGAGCTCTGTGACCGCCGCGGACACGGCCGTGTATTACTGTGCGAGAGATCAGATGGCAGCGGCTGCCCGCAACCGGTTCGATGTCTGGGGCCCGGGAGTCCTGGTCACCGTCTCCTCAG	QLQLQESGPGLVKPSETLSLTCAVSGGSISSNWWSWIRQPPGKGLEWIGRISGSGGSTSYNPSLKSRVTISTDTSKNQFSLKLSSVTAADTAVYYCARDQMAAAARNRFDVWGPGVLVTVSS*	GCGAGAGATCAGATGGCAGCGGCTGCCCGCAACCGGTTCGATGTC	ARDQMAAAARNRFDV	0	IGKV1-NL_12*01_S0682_kim	IGKJ1*01	GACATTCAGATGACCCAGTCTCCATCCTCCCTGTCTGCTTCTGTAGGAGACAGAGTCACCATCACTTGCCGGGCAAGTCAGGGCATTAGCAGTTATTTAAATTGGTATCAGCAGAAACCAGGGAAAGCCCCTAAGCTCCTGATCTATTATGCAAACCGTTTGGAAAATGGGGTCCCATCAAGGTTCAGCGGCAGTGGATCTGGGACAGAATTCACTCTCACCGTCAGCAGCCTGCAACCTGAGGATTTTGCAACTTATTACTGTCAACAGTATAATAGTTTACCGTGGACGTTCGGCCAAGGGACCAAGGTGGAAATCAAAC	DIQMTQSPSSLSASVGDRVTITCRASQGISSYLNWYQQKPGKAPKLLIYYANRLENGVPSRFSGSGSGTEFTLTVSSLQPEDFATYYCQQYNSLPWTFGQGTKVEIK	CAACAGTATAATAGTTTACCGTGGACG	QQYNSLPWT	0.4
35	S	37874	GGAAAGCTCGAACTGT-1	IGHV4-NL_1*02_S1702	IGHD3-41*01_S1308	IGHJ5-4*02	CAGGTGCAGCTGCAGGAGTCGGGCCCAGGACTGGTGAAGCCTTCGGAGACCCTGTCCCTCTCCTGCGCTGTCTCCGGTGGCTCTATCGGCGTTACCTACTGGAGTTGGATCCGCCAGGCCCCAGGGAAGCAACCGGAGTGGATAGGACGTATCGATGGTACTGGGAGCACCGACTACAACCCCTCCCTCGAGAGTCGAGTCACCCTGTCAGTAGACACGTCCAAGAACCAGTTCTCCCTGAAACTGAGGTCTGTGACCGCCGCGGACACGGCCGTTTATTACTGTGCGAGTTGGACTGGTTACTACAATAAATTCGATGTCTGGGGCCCGGGAGTCCTGGTCACCGTCTCCTCAG	QVQLQESGPGLVKPSETLSLSCAVSGGSIGVTYWSWIRQAPGKQPEWIGRIDGTGSTDYNPSLESRVTLSVDTSKNQFSLKLRSVTAADTAVYYCASWTGYYNKFDVWGPGVLVTVSS*	GCGAGTTGGACTGGTTACTACAATAAATTCGATGTC	ASWTGYYNKFDV	6.9	IGKV1-NL_12*01_S0682_kim	IGKJ2*01	GACATTCAGATGACCCAGTCTCCATCCTCCCTGTCTGCCTCTGTAGGAGACAGAGTCATCATCACTTGCCGGGCAAGCCAGGGCATCGGTACTTATTTAAATTGGTATCAGCAGAAACCAGGGAAAGCCCCTAAAGTCCTGATCTATTATGCAAACCGTTTGGAGAGTGGGGTCCCATCAAGGTTCAGCGGCAGTGGATCTGGGACAGAATTCACTCTCACCGTCAGTAGCCTGCAAACTGAGGATTTTGCAACTTATTACTGTCAACAGTTTAACAGTTTACCCTACACTTTTGGCCAGGGGACCAAAGTGGAGATCAAAC	DIQMTQSPSSLSASVGDRVIITCRASQGIGTYLNWYQQKPGKAPKVLIYYANRLESGVPSRFSGSGSGTEFTLTVSSLQTEDFATYYCQQFNSLPYTFGQGTKVEIK	CAACAGTTTAACAGTTTACCCTACACT	QQFNSLPYT	4.9
36	S	49934	ACTTGTTAGGGTCGAT-1	IGHV5-157*01	IGHD6-33*01	IGHJ6-6*01	GAGGTGCAGCTGGTGCAGTCTGGAGTAGAGGTGAAAAGGCCCGGGGAGTCTCTGAGGATCTCCTGTCAGACCTCTGGATACAGCTTTAGTAACAACTGGATCAGTTGGGTGCGCCACAAGCCCGGGAAAGGCCTGGAGTGGATGGGGAACATCCATCTTGGTGATTCTGATATTAGATATAACCCGACCTTCCAAGGCCACGTCACTATTTCAACAGACAAGTCCATCAGCACAGCCTACCTGCACTGGAGTAGCCTCAAGGCCTCGGACACCGCCACGTATTACTGTGCGAAAGTCGGGTCCAAGTATATTAGCGGCTGGTACGTTTACGGTTTGGATTCCTGGGGCCAAGGGGTCGTCGTCACCGTCTCGTCAG	EVQLVQSGVEVKRPGESLRISCQTSGYSFSNNWISWVRHKPGKGLEWMGNIHLGDSDIRYNPTFQGHVTISTDKSISTAYLHWSSLKASDTATYYCAKVGSKYISGWYVYGLDSWGQGVVVTVSS*	GCGAAAGTCGGGTCCAAGTATATTAGCGGCTGGTACGTTTACGGTTTGGATTCC	AKVGSKYISGWYVYGLDS	8.4	IGKV3-42*03_S5589_kim	IGKJ1*01	GAAATTGTGATGACACAATCTCCAGCCACCTTGTCTTTGTCTCCAGGGGAAACAGCCACCATCTCCTGTAGGACCAGTCAGAGTGTTAGCAGCAAGTTAGCCTGGTACCAGCACAAACCTGGGCAGGCTCCCAGGCTCCTCATCTCTGGTGCATCCTACAGGGCCACTGGCATCCCAGACAGGTTCAGTGGCAGTGGATCTGGGACAGACTTCACGCTCACCATCAGCAGCCTGGAGCCTGAAGATTTTGCAGTTTATTACTGTCAGGAGACTAGTAACTTGTGGACGTTCGGCCAAGGGACCAAGGTGGAAATCAAAC	EIVMTQSPATLSLSPGETATISCRTSQSVSSKLAWYQHKPGQAPRLLISGASYRATGIPDRFSGSGSGTDFTLTISSLEPEDFAVYYCQETSNLWTFGQGTKVEIK	CAGGAGACTAGTAACTTGTGGACG	QETSNLWT	7.9
37	S	221_0	AGAGCGACAAAGGTGC-1	IGHV1-138*01_S1600	IGHD2-10*01	IGHJ4-3*01	CAGGTCCAGCTGGTGCAGTCCGGGGCTGAAGTGAAGAAGCCTGGGTCCTCAGTGAAGGTTTCCTGCAAGGCTTCTGGATTCACCTCCGGCAGCGATGCTATCAGCTGGGTGCGACAGGCCCCCGGACAAGGGCTTGAGTGGATGGGACTGATCATGCCTCTTCTTGGTGTGACAAACTACGCAGAGAAGTTCCAGGGCAGAGTCACAATTAGCGCGGACACGTCCACATGGACAGTCTACATGGAGCTGGCCGGCCTGTCATCTGACGACACGGCCGTCTATTACTGTACTAGAGGACCTCAGGAATATTGTAGTAGTACTTCCTGCCCCAACTTTGACTACTGGGGCCAGGGAGTCCTGGTCACCGTCTCCTCAG	QVQLVQSGAEVKKPGSSVKVSCKASGFTSGSDAISWVRQAPGQGLEWMGLIMPLLGVTNYAEKFQGRVTISADTSTWTVYMELAGLSSDDTAVYYCTRGPQEYCSSTSCPNFDYWGQGVLVTVSS*	ACTAGAGGACCTCAGGAATATTGTAGTAGTACTTCCTGCCCCAACTTTGACTAC	TRGPQEYCSSTSCPNFDY	6.1	IGKV1-28*01_S8814_kim	IGKJ4*01_S4126_kim	GACATCCAGATGACCCAGTCTCCTTCCTCCCTGTCTGCTTCTGTCGGAGATACAGTCACCATCACTTGCCGGGCAAGTCAGGATATTAACAGTTATTTAAATTGGTTTCAGCAGAAACCAGGGAAAGCCCCTAAGCTCCTGATCTATGCTGCATCCAGTTTGGAAAGCGGGGTCCCATCAAGGTTCAGCGGCAGTGGATCTGGGACAGAATTCACTCTCACCATCAGCAGCCTGCAGCCTGAAGATTTCGCAACTTATTACTGTCTACAGCATAATGCTTACCCTCCCACTTTCGGCGGAGGGACCAGGGTGGAGCTCAAAC	DIQMTQSPSSLSASVGDTVTITCRASQDINSYLNWFQQKPGKAPKLLIYAASSLESGVPSRFSGSGSGTEFTLTISSLQPEDFATYYCLQHNAYPPTFGGGTRVELK	CTACAGCATAATGCTTACCCTCCCACT	LQHNAYPPT	2.4
38	S	-	TTAGGCAGTGTGACGA-1	IGHV3-141*02_S1149	IGHD3-18*01	IGHJ4-3*01	GAAGTGCAGCTGGTGGAGTCTGGGGGAGGCGTGGTACAGCCGGGGGGGTCCCTGAGACTCTTGTGTGCAGCCTCTGGATTCACCTTTGATGATTATGCCATGCACTGGGTCCGCCAAGTTCCAGGGAAGGGTCTGGAGTGGGTCGCTGATATTAGCTGGGATGGTGGTAGCGCATACTATGCAGACTCCGTGAAGGGCCGATTCACCATCTCCAGAGACAACTCAAAGAACACGGTCTCCCTGCAAATGAACAGCCTGAGAGCTGAGGACACGGCCGTGTTTTTCTGTGCAAAAGGCTATGATAGTGGGTTTTACTACTTTGACTCCTGGGGCCAGGGAGTCCAGGTCACCGTCTCCTCAG	EVQLVESGGGVVQPGGSLRLLCAASGFTFDDYAMHWVRQVPGKGLEWVADISWDGGSAYYADSVKGRFTISRDNSKNTVSLQMNSLRAEDTAVFFCAKGYDSGFYYFDSWGQGVQVTVSS*	GCAAAAGGCTATGATAGTGGGTTTTACTACTTTGACTCC	AKGYDSGFYYFDS	7.1	IGKV2-NL_8*01_S9623_kim	IGKJ1*01	GATATTGTGATGACCCAGACTCCACTCTCCCTGCCCGTCACCCCTGGAGAGCCGGCCTCCTTCTCCTGCAGGTCTACTCAGAGCCTCCTGCATAGTGATGGATACACCTATTTGGACTGGTACCTGCAGAAGCCAGGCCAGTCTCCACAGCTCTTGATCTATTTCGGTTCCTTCCGGGCCTCTGGAGTCCCTGACAGGTTCAGTGGCAGTGGGTCAGGCACTAATTTCACACTGAAAATCAGCCGGGTGGAGGCTGAGGATGTTGGGGTTTATTACTGCATGCAAGGCATACAGCTTCCCCGGACGTTCGGCCGAGGGACCAAGGTGGATTTCAAAC	DIVMTQTPLSLPVTPGEPASFSCRSTQSLLHSDGYTYLDWYLQKPGQSPQLLIYFGSFRASGVPDRFSGSGSGTNFTLKISRVEAEDVGVYYCMQGIQLPRTFGRGTKVDFK	ATGCAAGGCATACAGCTTCCCCGGACG	MQGIQLPRT	2.7
41	S	35905	GTGCATATCTCATTCA-1	IGHV4-93*01_S0054	IGHD5-27*01	IGHJ4-3*01	CAGGTGCAGCTGCAGGAGTCGGGCCCAGGGCTGGTGAGGCCTTCGGAGACCCTGTCCCTCACCTGCGGTGTCTCTCATTTCTCCATCACCAATGTTTATGGCTGGAGTTGGATCCGCCAGCCCCCAGGGAAGGGACTGGACTGGATTGGATACTTCTCTTATAGTGGACACACCTACTACAATCCCTCCCTCAAGAGTCGCGTCAGGATTTCTAGAGACACGTCCAAGAGCCAGTTCTCCCTGGAACTGACCTCTGTGACCGCCGCGGACACGGCCGTGTATTTCTGTGCGGTCCAGACAGGTTACAGTGGCCTTGACTCCTGGGGCCAGGGAGTCCTGGTCACCGTCTCCTCAG	QVQLQESGPGLVRPSETLSLTCGVSHFSITNVYGWSWIRQPPGKGLDWIGYFSYSGHTYYNPSLKSRVRISRDTSKSQFSLELTSVTAADTAVYFCAVQTGYSGLDSWGQGVLVTVSS*	GCGGTCCAGACAGGTTACAGTGGCCTTGACTCC	AVQTGYSGLDS	10	IGKV1-22*01_S6268_kim	IGKJ2*01	GACATCCAGATGACCCAGTCTCCATCCTCCCTGTCTGCTTCTGTAGGAGACACAGTCACCATCACTTGCCGGGCGAGTCAGAGTATTAGTAGTTGGTTAGACTGGTATCAGCAGAAACCAGGGAAAGCCCCTAAACTCCTGATCTATAAGGCATCCACTTTGCAAAGTGGGGTCCCATCAAGATTCAGCGGCAGTGGATCTGGGACAGATTTCACTCTCACCATCAGCAGCCTTCAGCCTGAAGATTTTGCAACTTATTATTGTCTACAGTATAGTGGTAGCCAGTACAGTTTTGGCCAGGGGACCAAAGTGGACATCAA	DIQMTQSPSSLSASVGDTVTITCRASQSISSWLDWYQQKPGKAPKLLIYKASTLQSGVPSRFSGSGSGTDFTLTISSLQPEDFATYYCLQYSGSQYSFGQGTKVDI	CTACAGTATAGTGGTAGCCAGTACAGT	LQYSGSQYS	3.5
42	neut	50667	CGAGAAGAGATATGCA-1	IGHV6-1*02	IGHD2-14*02_S0100	IGHJ5-4*03	CAGGTGCAGCTGCAGGAGTCAGGTCCAGGACTGGTGAAGCCCTCACAGACCCTGTCACTCACCTGTGCCATCTCCGGGGACAGTGTCTCTAGCGACAGTGCTACTTGGAACTGGATCAGGCAGTCGCCATCGAGAGGCCTTGAGTGGCTGGGAAGGACATACTACAGGTCCAAGTGGTATTATGATTATGCACAATCTGTGCAAAATCGAATAACCATCAACCCAGACACATCCAAGAACCACTTCTCCCTACAACTGAACTCTGTGACCCCCGAGGACATGGCCGTGTATTACTGTACCAGAGAGTGGGAACTAGGATATTGTACTGGTGGTGTCTGCTACGGGTCCCACAACCGGATCGATGTCTGGGGCCCGGGAGTCCTGGTCACCGTCTCCTCAG	QVQLQESGPGLVKPSQTLSLTCAISGDSVSSDSATWNWIRQSPSRGLEWLGRTYYRSKWYYDYAQSVQNRITINPDTSKNHFSLQLNSVTPEDMAVYYCTREWELGYCTGGVCYGSHNRIDVWGPGVLVTVSS*	ACCAGAGAGTGGGAACTAGGATATTGTACTGGTGGTGTCTGCTACGGGTCCCACAACCGGATCGATGTC	TREWELGYCTGGVCYGSHNRIDV	2.6	IGKV2-61*01_kim_S4545	IGKJ4*01_S4126_kim	GATTTTGTGATGACCCAGACTCCACTCTCCCTGTCAGTCACCCCTGGAGAGCCAGCCTCCATCTCCTGCAGGTCTAGTCAGAGCCTCCTGCATAGTGATGGATATCCCTATTTGGCTTGGTACCTGCAGAAGCCAGGCCAGTCTCCGCAGCTCCTGATTTATGGGGGTTCCAACAGAGCCTCTGGAGTCCCAGACAGGTTCAGTGGCAGTGGGTCAGGCACTGATTTCACACTGAAAATCAGCAAGGTGGAGGCGGAGGATGTTGGGGTTTATTACTGCATGCAACATAAAGCGCTTCCCCTCACTTTCGGCGGAGGGACCAAGGTGGAGCTCAAAC	DFVMTQTPLSLSVTPGEPASISCRSSQSLLHSDGYPYLAWYLQKPGQSPQLLIYGGSNRASGVPDRFSGSGSGTDFTLKISKVEAEDVGVYYCMQHKALPLTFGGGTKVELK	ATGCAACATAAAGCGCTTCCCCTCACT	MQHKALPLT	1.7
44	neut	2319	CGAGCCAAGGTGATAT-1	IGHV1-NL_2*01_S2809	IGHD3-41*01	IGHJ4-3*01	CAGGTGCGCCTGGTGCAGTCTGGGGCTGAGGTGAAGAAGCCTGGATCCTCAGTGAAGGTCTCCTGCAAGGCTTCCGGATACACCTTCACTGACTACTTCATTCAGTGGGTGCGACAGGCCCCTGGACAAGGGCTTGAGTGGATGGGAGACATCAACCCAAAGACTGGTGCCACACACTATGCACAGAAGTTCCAGGGCAGAGTCACCATGACCAGAGACACATCGACGAGTACAGCCTACATGGAACTGAGCAGCCTGAAATCTGAGGACACGGCCGTCTATTACTGTGCAACCCACCCCTTTTACAATATTTCGACTGGTTCTTACTCTGACTACTGGGGCCAGGGAGTCCTGGTCACCGTCTCCTCAG	QVRLVQSGAEVKKPGSSVKVSCKASGYTFTDYFIQWVRQAPGQGLEWMGDINPKTGATHYAQKFQGRVTMTRDTSTSTAYMELSSLKSEDTAVYYCATHPFYNISTGSYSDYWGQGVLVTVSS*	GCAACCCACCCCTTTTACAATATTTCGACTGGTTCTTACTCTGACTAC	ATHPFYNISTGSYSDY	4.1	IGKV1S5*01_S5499	IGKJ2*01	GACATCCAGATGACCCAGTCTCCATCTTCCTTATCTGCATCTGTAGGAGACAGAGTCACCATCACTTGTCGGGCTAGTCAGACCATTACCAGTTCTTTAGCCTGGTATCAGCAGAAACCAGGGAAAGCCCCTAAGCTCCTGATCTATACTACATCCACTTTGGAAAGTGGGATCCCATCAAGGTTCGCCAGCAGTGGATCTGGGACAGAGTTCACTCTCACCATCAGCAGCCTGCAGCCTGAAGATTTTGCAACTTATTACTGTCACCAACATGATGGTCCCCCGTACACTTTTGGCCAGGGGACCAAAGTGGACATCAAAC	DIQMTQSPSSLSASVGDRVTITCRASQTITSSLAWYQQKPGKAPKLLIYTTSTLESGIPSRFASSGSGTEFTLTISSLQPEDFATYYCHQHDGPPYTFGQGTKVDIK	CACCAACATGATGGTCCCCCGTACACT	HQHDGPPYT	4.9
45	S	17648	CTGCGGAAGATGTCGG-1	IGHV3-NL_1*01_S4331	IGHD2-14*01	IGHJ4-3*01	GAGGTGCAGCTGGTGGAGTCTGGGGGAGGCTTGGTCCAGCCTGGAGGGTCCCTGAGACTCTCCTGTGCAGCCTCTGGATTCACCTTCAGTAGTTACGACATGAGCTGGGTCCGCCAGGCTCCGGGAAAGGGGCTGGAGTGGGTCTCATATATTAGTTACACTGGTAAAACCATATACTACGCTGACTCCGTGAAGGGCCGATTCACCATCTCCAGAGACAACGCCAAGAACTCGCTGTCTCTGCACATGAGCAGCCTGAGAGCCGAGGACACGGCCGTGTATTACTGTACTAGAGCCTTCGTGGGCTGGGGCCAGGGAGTCCTGGTCACCGTCTCCTCAG	EVQLVESGGGLVQPGGSLRLSCAASGFTFSSYDMSWVRQAPGKGLEWVSYISYTGKTIYYADSVKGRFTISRDNAKNSLSLHMSSLRAEDTAVYYCTRAFVGWGQGVLVTVSS*	ACTAGAGCCTTCGTGGGC	TRAFVG	0.3	IGKV2-NL_3*01_S1264_kim	IGKJ1*01	GATGTTTTGATGACTCAGTCTCCACTCTCCCTGCCCGTCACCCCTGGACAGCCGGCCTCGATCTCCTGCAGGTCTAGTCAGAGCCTCCTGCATAGTGATGGAAACACTTACTTGAGTTGGTTTCTGCAGAAGCCAGGCCAACCTCCAAGGCGCCTAATTTATAACGTTTCTAACCGGGACTCTGGGGTCCCAGACAGATTCAGCGGCAGTGGGGCAGGGACAGATTTCACACTGAAAGTCAGCAGAGTGGAGGCTGAGGATGTCGGGGTTTATTACTGCATGCAAGGTACACACTGGCCGTGGACGTTCGGCCAAGGGACCAAGGTGGAAATCAAAC	DVLMTQSPLSLPVTPGQPASISCRSSQSLLHSDGNTYLSWFLQKPGQPPRRLIYNVSNRDSGVPDRFSGSGAGTDFTLKVSRVEAEDVGVYYCMQGTHWPWTFGQGTKVEIK	ATGCAAGGTACACACTGGCCGTGGACG	MQGTHWPWT	1.3
46	S	4200	AGCAGCCGTCTTGATG-1	IGHV2-7*02_S4078	IGHD3-18*01	IGHJ4-3*01	CAGGTGACCTTGAGGGAGTCTGGTCCTGCGCTAGTGAAACCCACACAGACCCTCACGCTGACCTGCACCTTCTCTGGGTTCTCACTCAGAACTTCTGGCTTGCGTGTGCACTGGATCCGTCAGCCCCCAGGAAAGGCCCTGGAGTGGCTTGCACGCATTGATTGGGATGATGATAGATACTATAATACATCTCTGAAGACTAGACTCACCATCTCCAACGACGCCTCCAAGAACCAGGTTGTCCTTACAATGACCAACATGGACCCTATGGACACGGCCACATATTACTGTGCACGGGGCGGTCAGTATGGTAGTGGCTATATCGACTTCTGGGGCCAGGGAGTCCTGGTCACCGTCTCCTCAG	QVTLRESGPALVKPTQTLTLTCTFSGFSLRTSGLRVHWIRQPPGKALEWLARIDWDDDRYYNTSLKTRLTISNDASKNQVVLTMTNMDPMDTATYYCARGGQYGSGYIDFWGQGVLVTVSS*	GCACGGGGCGGTCAGTATGGTAGTGGCTATATCGACTTC	ARGGQYGSGYIDF	5	IGKV1-66*01_S1426_kim	IGKJ4*01_S4126_kim	GACATCCAGATGACGCAGTCTCCATCCTCCCTGTCTGCATCTATAGGAGACAGAGTCACCATCACTTGCCGGGCGAGTCAGGACATTAACAATTATTTAACTTGGTGTCAGCAGAAGCCAGGGAAAGCCCCTAAGCCCCTGATCTATTATGCATCCACTTTGGAAGCAGGGGTTCCATCTAGGTTCAGTGGAAGAAGATCTGGGACAGATTATATTCTCACCATCAGCAGTCTGCAGCCTGAAGATGTTGCAACCTATTACTGTCAACAGTATAATTATTTCCCTCTCACTTTCGGCGGAGGGACCAGGGTGGAGCTCAAAC	DIQMTQSPSSLSASIGDRVTITCRASQDINNYLTWCQQKPGKAPKPLIYYASTLEAGVPSRFSGRRSGTDYILTISSLQPEDVATYYCQQYNYFPLTFGGGTRVELK	CAACAGTATAATTATTTCCCTCTCACT	QQYNYFPLT	5.2
47	S	14787	AGATTGCAGTAATCCC-1	IGHV3-76*02_S4190	IGHD1-2*01	IGHJ4-3*01	GAGGTGCAGCTGGTGGAGTCTGGGGGCGGCTTGGCAAAGCCTGGGGGATCCCTGAGACTCTCCTGTGCAGCCTCTGGATTCACCTTCAATAATCATGCTATGCACTGGGTCCGCCAGGCTCCAGGAAAGGGGCTGGAGTGGGTCTCAACCATTAGTAGTGGTGGTAACACAAACTACGCAAAGTCCGTGAAGGGCCGATTCACCATCTCCAGAGACAACTCAGAGAACACGCTCTCCCTGCAAATGGATAGCCTGAAAACTGAGGACACGGCCGTATATTACTGTGCGAAAGATTTCGCAACATTGGGGGAACGACGTTACTTTGACTACTGGGGCCAGGGAGTCCTGGTCACCGTCTCCTCAG	EVQLVESGGGLAKPGGSLRLSCAASGFTFNNHAMHWVRQAPGKGLEWVSTISSGGNTNYAKSVKGRFTISRDNSENTLSLQMDSLKTEDTAVYYCAKDFATLGERRYFDYWGQGVLVTVSS*	GCGAAAGATTTCGCAACATTGGGGGAACGACGTTACTTTGACTAC	AKDFATLGERRYFDY	5.8	IGKV3-17*01_S0783	IGKJ1*01	GACATTGTGCTGACCCAGTCTCCAGCCTCTTTGGCCGTGTCTCCAGGGCAGAGGGCCGCCATCACCTGCAGAGCCAGTGAAACTGTCAGTGTCTTTGGCGTAAACCTCATTCACTGGTATCAGCTGAAACCAGGACAACCTCCTAAACTCCTGATTTACGAATCCTCCAATAAAGACGCTGGGGTCCCAGCCAGGTTCAGCGGCAGTGGGTCTGGGACCGACTTCACCCTCATAATTAATCCTGTGGAACCTGACGATGCTGCAGATTATTACTGTCTGCAGAGTAAGAATTCTTGGACGTTCGGCCAGGGGACCAAGGTGGAAATCAAAC	DIVLTQSPASLAVSPGQRAAITCRASETVSVFGVNLIHWYQLKPGQPPKLLIYESSNKDAGVPARFSGSGSGTDFTLIINPVEPDDAADYYCLQSKNSWTFGQGTKVEIK	TGTCTGCAGAGTAAGAATTCTTGGACG	CLQSKNSWT	29.4
48	S	11467	ACCAGTAGTATGGTTC-1	IGHV3-50*01	IGHD6-33*01	IGHJ5-4*03	GAGGTGCAGCTGGTGGAGTCTGGAGGAGGCTTGGTTCAGCCTGGGGGGTCCCTGAGACTCTCCTGTGCAGCCTCTGGATTCACCTTCAGTATCTCTGCCATGCACTGGGTCCGCCAGGCTCCAGGGAAGGGGCTGGAGTGGGTGGCAGTTATATCGTATGATGGAAGTGAACAAACCTACGCAGACTCTGTGAAGGACCGATTCACCATCTCCAGAGACAATTCCAAGGACATGGCATATCTTCAAATGAATAACCTGAAATTGGAGGACACGGCCGTGTATTACTGTGCGAGAGGCGCTAGCAACGGCTACTACCGGTTCGATGTCTGGGGCCCGGGAGTCCTGGTCACCGTCTCCTCAG	EVQLVESGGGLVQPGGSLRLSCAASGFTFSISAMHWVRQAPGKGLEWVAVISYDGSEQTYADSVKDRFTISRDNSKDMAYLQMNNLKLEDTAVYYCARGASNGYYRFDVWGPGVLVTVSS*	GCGAGAGGCGCTAGCAACGGCTACTACCGGTTCGATGTC	ARGASNGYYRFDV	4.1	IGKV1-66*01_S1426_kim	IGKJ4*01_S4126_kim	GACATCCAGATGACGCAGTCTCCATCCTCCCTGTCTGCATCTGTAGGAGACAGAGTCACCCTCACTTGCCGGGCGAGTCAGGACATTAACAATTATTTAACTTGGTATCAGCAGAAACCAGGGAAAGCCCCTAAGCCCCTGATCTACTATGCATCCAGTTTGGAAACAGGGGTACCATCAAGGTTCAGTGGAAGCAGATCTGGGACAGATTATAGTTTCACCATCGCCAGTCTGCAGCCTGAAGATATTGCAACATATTACTGTCAACAGTATAATAATTTCCCTCCCACTTTCGGCGGAGGGACCAAGGTGGAGCTCAAAC	DIQMTQSPSSLSASVGDRVTLTCRASQDINNYLTWYQQKPGKAPKPLIYYASSLETGVPSRFSGSRSGTDYSFTIASLQPEDIATYYCQQYNNFPPTFGGGTKVELK	CAACAGTATAATAATTTCCCTCCCACT	QQYNNFPPT	3.5
49	S	-	CTTTGCGTCACTGGGC-1	IGHV1-138*02_S0520	IGHD3-41*01	IGHJ4-3*01	CAGGAGCAGCTGGTGCAGTCTGGGGCTGAGGTGAAGAAGCCTGGGGCCTCAGTGAAGGTCTCCTGCAAAGCTTCTAGATACATTTTCACCAGTTGTGTTATCAGCTGGCTGCGACAGGCCCCTGGACAAGGGTTTGAGTGGATGGGAGGAATCCACCCTACTTTTGGTAGCACAAGTTACGCACAGAAGTTCCAGGGCAGAGTCACGATTACCGCGGACATGTCCACGAGCACAGTCTACATGGAGCTGAGCAGTCTGAGATCTGAGGACATGGCCGTGTATTACTGTGCAGCAGGAGGCCGGACTGGTTATTACTTTGACTACTGGGGCCAGGGAGTCCTGGTCACCGTCTCCTCAG	QEQLVQSGAEVKKPGASVKVSCKASRYIFTSCVISWLRQAPGQGFEWMGGIHPTFGSTSYAQKFQGRVTITADMSTSTVYMELSSLRSEDMAVYYCAAGGRTGYYFDYWGQGVLVTVSS*	GCAGCAGGAGGCCGGACTGGTTATTACTTTGACTAC	AAGGRTGYYFDY	12.4	IGKV1-66*01_S1426_kim	IGKJ2*01	GACATCCAGATGACGCAGTCTCCATCCTCCCTGTCTGCATCTGTAGGAGACAGAGTCACCATCACTTGCCGGGCGAGTCAGGGCATTAACAATTATTTAAGTTGGTATCAGCAGAAACCAGGGAAAGCCCCTAAGCCCCTGATCTATTATGCATCCAGTTTGGAAACAGGGGTACCATCAAGGTTCAGTGGAAGTAGATCTGGGACAGATTATACTCTCACCATCAGCAGTCTGCAGCCTGAAGATATTGCAACATATTACTGTCAACAGTATAATAATTCCCCGTACAGTTTTGGCCAGGGGACCAAAGTGGAGATCAAAC	DIQMTQSPSSLSASVGDRVTITCRASQGINNYLSWYQQKPGKAPKPLIYYASSLETGVPSRFSGSRSGTDYTLTISSLQPEDIATYYCQQYNNSPYSFGQGTKVEIK	CAACAGTATAATAATTCCCCGTACAGT	QQYNNSPYS	0
51	neut	25287	GACTAACGTAGTAGTA-1	IGHV4-117*01	IGHD6-38*01	IGHJ4-3*01	CAGCTGCAGCTGCAGGAGTCGGGCCCAGGACTGGTGAAGCCTTCGGAGACCCTGTCCCTCACCTGCGCTGTCTCTGGTGGCTCCATCAGCAGTAACTACTGGACCTGGATCCGCCAGTCCCCAGAGAAGGGACTGGAATGGATTGGACGTATCTCTGGTAGTGGTGGGAGCACCGACTACAATCCCTCCCTCAAGAGTCGAGTCACCCTTTCAACAGACACGTCCAAGAACCAGTTCTCCCTGAAGCTGCTCTCTGTGACCGCCGCGGACACGGCCGTATATTACTGTGCGACTTTTACTTCGTCTAACACCTGGTCCCGGTCTTTGGCTGGTCCGAAGGACTACTGGGGCCAGGGAGTCCTGGTCACCGTCTCCTCAG	QLQLQESGPGLVKPSETLSLTCAVSGGSISSNYWTWIRQSPEKGLEWIGRISGSGGSTDYNPSLKSRVTLSTDTSKNQFSLKLLSVTAADTAVYYCATFTSSNTWSRSLAGPKDYWGQGVLVTVSS*	GCGACTTTTACTTCGTCTAACACCTGGTCCCGGTCTTTGGCTGGTCCGAAGGACTAC	ATFTSSNTWSRSLAGPKDY	3.1	IGKV1-32*03_S8344_kim	IGKJ3*01	GACATTCAGATGTCCCAGTCTCCATCCTCTCTGTCTGTTTCTGTAGGAGACAGAGTCACCATCACTTGTCGGGCAAGTCAGGGCATTAGCAACGCTTTAGTCTGGTATCAGCAGAAACCAGGGAAAGCCCCTAAGGTCCTGGTCTATTATACAGACAGTTTGACAAGTGGGGTCCCATCAAGGTTCAGCGGCAGTGGATCTGGGACGGATTACACTCTCACCATCAACAGCCTGCAGCCTGAAGATTTTGCTACTTATTACTGTCAACAGGTTGACAGTATTCCATTCACTTTCGGCCCCGGGACCAAACTGGATTTCAAAC	DIQMSQSPSSLSVSVGDRVTITCRASQGISNALVWYQQKPGKAPKVLVYYTDSLTSGVPSRFSGSGSGTDYTLTINSLQPEDFATYYCQQVDSIPFTFGPGTKLDFK	CAACAGGTTGACAGTATTCCATTCACT	QQVDSIPFT	5
55	neut	27358	CCTAGCTGTGTGTGCC-1	IGHV4-117*01_S6342	IGHD3-19*02_S4720	IGHJ4-3*01	CAGCTGCAGCTGCAGGAGTCGGGCCCAGGACTGGTGAAGCCTTCAGAGGCCCTGTCCCTCAGCTGCTCTGTCTCTGGTGGCTCCATCAGTGGTAACTGGTGGAACTGGATCCGCCAGCCCCCAGGGAAGGGACTGGAGTGGATTGGACGTATCTCTGGTAGTCGTGGGAGCACCAGCTACAACCCCTCCCTCAAGAGTCGAGTCACCATTTCAACAGACACCTCCAAGAACCAATTCTCCCTGAGGCTGAGCTCTGTGACCGCCGCGGACACGGCCGTGTATTATTGTGCGAGAGAGCCTACGTACTGGAGTGGTCTTCCACGGGACTACTGGGGCCAGGGAGTCCTGGTCACCGTCTCCTCAG	QLQLQESGPGLVKPSEALSLSCSVSGGSISGNWWNWIRQPPGKGLEWIGRISGSRGSTSYNPSLKSRVTISTDTSKNQFSLRLSSVTAADTAVYYCAREPTYWSGLPRDYWGQGVLVTVSS*	GCGAGAGAGCCTACGTACTGGAGTGGTCTTCCACGGGACTAC	AREPTYWSGLPRDY	3.4	IGKV3-53*02_kim	IGKJ3*01	CAAGTTATATTGACTCAGTCTCCAGCCACCCTGTCTTTGTCTCCAGGGGAAAGAGCCACCCTCTCCTGCAGGGCCAGTCAGAGTGTCAGCAGCAACTTAGCCTGGTACCAGCAGAAACCTGGGCAGGCTCCCAGGCTCCTCATCTATGATGCATCCAACAGGGCCACTGGCATCCCAGACAGGTTCAGTGGCAGTGGGTCTGGGACAGAGTTCACTCTCACCATCAGCAGCCTGGAGCCTGAAGATTTTGCAGTGTATTACTGTCAGAAGTATAGTAGCTTACCATTCACTTTCGGCCCCGGGACCAAACTGGACATCAAAC	QVILTQSPATLSLSPGERATLSCRASQSVSSNLAWYQQKPGQAPRLLIYDASNRATGIPDRFSGSGSGTEFTLTISSLEPEDFAVYYCQKYSSLPFTFGPGTKLDIK	CAGAAGTATAGTAGCTTACCATTCACT	QKYSSLPFT	1.1
	Legend
	S	Spike binder, non-RBD binder, non neutralizer
	RBD	Spike binder, RBD binder, non neutralizer
	neut	Spike binder, RBD binder, neutralizer
