# Supplementary material for: Multi-compartmental diversification of neutralizing antibody lineages dissected in SARS-CoV-2 spike-immunized macaques
Source: Nat Commun. 2024 Jul 27;15:6338. doi: 10.1038/s41467-024-50286-0 (PMC11283548; doi:10.1038/s41467-024-50286-0)
Supplement: Supplementary file 7 — Dataset 4 [file 41467_2024_50286_MOESM7_ESM.xlsx]

## Sheet: mab23 tree SHM
Sequence ID	Sequence (NT)	Sequence (AA)	VDJ_mut	VDJ_SHM	V_mut	V_SHM	J_mut	J_SHM
perLN_199	GAGGTGCAGCTGGTGGAGTCTGGAGGAGGCTTGGTTCAGCCGGGGGGGTCCCTGAGACTCTCCTGTGCAGCCTCTGGTTTCACCTTCAGTAACTATGGCATGCACTGGGTCCGCCAGGCTCCAGGGAAGGGGCTGGAGTGGGTGGCAATTATATCGTATGATGGAAGTACGAAATACTTCGCAGACTCTGTGAAGGACCGATTCACCATCTCCAGAGACAATTCCAAGACCATGCTATATCTTCAAATGAACAACCTGAAATTGGAGGACACGGCCGTCTATTACTGTGCGAGAGATTTAGGAACCTACGATGACTCCTGGGGCCAGGGAGTCCTGGTCACCGTCTCCTCAG	EVQLVESGGGLVQPGGSLRLSCAASGFTFSNYGMHWVRQAPGKGLEWVAIISYDGSTKYFADSVKDRFTISRDNSKTMLYLQMNNLKLEDTAVYYCARDLGTYDDSWGQGVLVTVSS	9	2.55682	8	2.7	1	2.4
axLN_3	GAGGTGCAGCTGGTGGAGACTGGAGGAGGCTTGGTCCAGCCTGGGGGGTCCCTGAAACTCTCCTGTGCAGCCTCTGGATTCACCTTCAGTAACTATGGCTTCCACTGGGTCCGCCAGGCTCCAGGGAAGGGACTGGAATGGGTGGCAATGATCTCGTATGATGGAATTACGAAATACTACGTAGACTCTGTGAAGGACCGATTCACCATCTCCAGAGACAATTCCAAGACCATGCTATATCTTCAAATGAACAACCTGAAATTGGAGGACACGGCCGTCTATTACTGTGCGAGAGATTTAGGAACCTACGATGACTCCTGGGGTCAGGGAGTCCTGGTCACCGTCTCCTCAG	EVQLVETGGGLVQPGGSLKLSCAASGFTFSNYGFHWVRQAPGKGLEWVAMISYDGITKYYVDSVKDRFTISRDNSKTMLYLQMNNLKLEDTAVYYCARDLGTYDDSWGQGVLVTVSS	18	5.11364	16	5.4	2	4.9
axLN_7	GAGGTGCAGCTGGTGGAGTCTGGAGGAGGCTTGGTTCAGCCTGGGGGGTCCCTGAGACTCTCCTGTGGAGCCTCTGGATTCACCTTCAGTAACTATGGCTTCCACTGGGTCCGCCAGGCTCCAGGGAAGGGACTGGAATGGGTGGCAATGATCTCGTATGATGGAATTACGAAATACTACGTAGACTCTGTGAAGGACCGATTCACCATCTCCAGAGACAATTCCAAGACCATGCTATATCTTCAAATGAACAACCTGAAATTGGAGGACACGGCCGTCTATTACTGTGCGAGAGATTTAGGAACCTACGATGACTCCTGGGGTCAGGGAGTCCTGGTCACCGTCTCCTCAG	EVQLVESGGGLVQPGGSLRLSCGASGFTFSNYGFHWVRQAPGKGLEWVAMISYDGITKYYVDSVKDRFTISRDNSKTMLYLQMNNLKLEDTAVYYCARDLGTYDDSWGQGVLVTVSS	16	4.54545	14	4.7	2	4.9
axLN_18	GAGGTGCAGGTGGTGGAGTCTGGAGGGGGCTTGGTTCAGCCAGGGGGGTCCCTGAGACTCTCCTGTGGAGCCTCTGGATTCACCTTCAGTAACTATGGCTTCCACTGGGTCCGCCAGGCTCCAGGGAAGGGACTGGAATGGGTGGCAATGATCTCGTATGATGGAATTACGAAATACTACGTAGACTCTGTGAAGGACCGATTCACCATCTCCAGAGACAATTCCAAGACCATGCTATATCTTCAAATGAACAACCTGAAATTGGAGGACACGGCCGTCTATTACTGTGCGAGAGATTTAGGAACCTACGATGACTCCTGGGGTCAGGGAGTCCTGGTCACCGTCTCCTCAG	EVQVVESGGGLVQPGGSLRLSCGASGFTFSNYGFHWVRQAPGKGLEWVAMISYDGITKYYVDSVKDRFTISRDNSKTMLYLQMNNLKLEDTAVYYCARDLGTYDDSWGQGVLVTVSS	19	5.39773	17	5.7	2	4.9
axLN_837	GAGGTGCAGGTGGTGGAGTCTGGAGGGGGCTTGGTTCAGCCGGGGGGGTCCCTGAGACTCTCCTGTGGAGCCTCTGGATTCACCTTCAGTAACTATGGCTTCCACTGGGTCCGCCAGGCTCCAGGGAAGGGACTGGAATGGGTGGCAATGATCTCGTATGATGGAATTACGAAATACTACGTAGACTCTGTGAAGGACCGATTCACCATCTCCAGAGACAATTCCAAGACCATGCTATATCTTCAAATGAACAACCTGAAATTGGAGGACACGGCCGTCTATTACTGTGCGAGAGATTTAGGAACCTACGATGACTCCTGGGGTCAGGGAGTCCTGGTCACCGTCTCCTCAG	EVQVVESGGGLVQPGGSLRLSCGASGFTFSNYGFHWVRQAPGKGLEWVAMISYDGITKYYVDSVKDRFTISRDNSKTMLYLQMNNLKLEDTAVYYCARDLGTYDDSWGQGVLVTVSS	19	5.39773	17	5.7	2	4.9
axLN_120	GAGGTGCAGGTGGTGGAGTCTGGAGGGGGCTTGGTTCAGCCGGGGGGGTCCCTGAGACTCTCCTGTGGAGGCTCTGGATTCACCTTCAGTAACTATGGCTTCCACTGGGTCCGCCAGGCTCCAGGGAAGGGACTGGAATGGGTGGCAATGATCTCGTATGATGGAATTACGAAATACTACGCAGACTCTGTGAAGGACCGATTCACCATCTCCAGAGACAATTCCAAGACCATGCTATATCTTCAAATGAACAACCTGAAATTGGAGGACACGGCCGTCTATTACTGTGCGAGAGATTTAGGAACCTACGATGACTCCTGGGGTCAGGGAGTCCTGGTCACCGTCTCCTCAG	EVQVVESGGGLVQPGGSLRLSCGGSGFTFSNYGFHWVRQAPGKGLEWVAMISYDGITKYYADSVKDRFTISRDNSKTMLYLQMNNLKLEDTAVYYCARDLGTYDDSWGQGVLVTVSS	19	5.39773	17	5.7	2	4.9
spleen_49	GAGGTGCAGGTGGTGGAGTCTGGAGGGGGCTTGGTTCAGCCGGGGGGGTCCCTGAGACTCTCCTGTGGAGGCTCTGGATTCACCTTCAGTAACTATGGCTTCCACTGGGTCCGCCAGGCTCCAGGGAAGGGACTGGAATGGGTGGCAATGATCTCGTATGATGGAATTACGAAATACTACGCAGACTCTGTGAAGGACCGATTCACCATCTCCAGAGACAATTCCAAGACCATGCTATATCTTCAAATGAACAACCTGAAATTGGAGGACACGGCCGTCTATTACTGTGCGAGAGATTTAGGAACCTACGATGACTCCTGGGGTCAGGGAGTCCTGGTCACCGTCTCCTCAG	EVQVVESGGGLVQPGGSLRLSCGGSGFTFSNYGFHWVRQAPGKGLEWVAMISYDGITKYYADSVKDRFTISRDNSKTMLYLQMNNLKLEDTAVYYCARDLGTYDDSWGQGVLVTVSS	19	5.39773	17	5.7	2	4.9
axLN_755	GAGGTGCAGCTGGTGGAGTCTGGAGGAGGCTTGGTTCAGCCGGGGGGGTCCCTGAGACTCTCCTGTGCAGCCTCTGGATTCACCTTCAGTAACTATGGCTTCCACTGGGTCCGCCAGGCTCCAGGGAAGGGGCTGGAGTGGGTGGCAATTATATCGTATGATGGAATTACGAAATACTACGCAGACTCTGTGAAGGGCCGATTCACCGTCTCCAGAGACAATTCCAAGACCATGGTATATCTTCAAATGAACAACCTGAAATTGGAGGACACGGCCGTCTATTACTGTGCGAGAGATTTAGGAACCTACGATGACTCCTGGGGCCAGGGAGTCCTGGTCACCGTGTCCTCAG	EVQLVESGGGLVQPGGSLRLSCAASGFTFSNYGFHWVRQAPGKGLEWVAIISYDGITKYYADSVKGRFTVSRDNSKTMVYLQMNNLKLEDTAVYYCARDLGTYDDSWGQGVLVTVSS	14	3.97727	12	4.1	2	4.9
axLN_4	GAGGTGCAGCTGGTGGAGACTGGAGGAGGCTTGGTCCAGCCTGGGGGGTCCCTGAAACTCTCCTGTGCAGCCTCTGGATTCACCTTCAGTAACTATGGCTTCCACTGGGTCCGCCAGGCTCCAGGGAAGGGGCTGGAGTGGGTGGCAATTATATCGTATGATGGAATTACGAAATACTACGCAGACTCTGTGAAGGGCCGATTCACCGTCTCCAGAGACAATTCCAAGACCATGGTATATCTTCAAATGAACAACCTGAAATTGGAGGACACGGCCGTCTATTACTGTGCGAGAGATTTAGGAACCTACGATGACTCCTGGGGCCAGGGAGTCCTGGTCACCGTGTCCTCAG	EVQLVETGGGLVQPGGSLKLSCAASGFTFSNYGFHWVRQAPGKGLEWVAIISYDGITKYYADSVKGRFTVSRDNSKTMVYLQMNNLKLEDTAVYYCARDLGTYDDSWGQGVLVTVSS	16	4.54545	14	4.7	2	4.9
BM_10	GAGGTGCAGCTGGTGGAGTCTGGAGGAGGCTTGGTTCAGCCGGGGGGTTCCCTGAGACTCTCCTGTGCAGCCTCTGGATTCACCTTCAGTAACTTTGGCTTCCACTGGGTCCGCCAGGCTCCAGGGAAGGGGCTGGAGTGGGTGGCAATTATATCATATGATGGAATTACGAAATACTACGCAGACTCTGTGAAGGACCGATTCACCGTCTCCAGAGACAATTCCAAGACCATGGTATATCTCCAAATGAACAACCTGAAATTGGAGGACACGGCCGTCTATTACTGTGCGAGAGATTTAGGAACCTACGATGACTCCTGGGGCCAGGGAGTCCTGGTCACCGTCTCCTCAG	EVQLVESGGGLVQPGGSLRLSCAASGFTFSNFGFHWVRQAPGKGLEWVAIISYDGITKYYADSVKDRFTVSRDNSKTMVYLQMNNLKLEDTAVYYCARDLGTYDDSWGQGVLVTVSS	16	4.54545	15	5.1	1	2.4
spleen_272	GAGGTGCAGCTGGTGGAGTCTGGAGGAGGCTTGGTTCAGCCGGGGGGTTCCCTGAGACTCTCCTGTGCGGCCTCTGGATTCACCTTCAGTAACTTTGGCTTCCACTGGGTCCGCCAGGCTCCAGGGAAGGGGCTGGAGTGGGTGGCAATTATATCATATGATGGAATTACGAAATACTACGCAGACTCTGTGAAGGACCGATTCACCGTCTCCAGAGACAATTCCAAGACCATGGTATATCTCCAAATGAACAACCTGAAATTGGAGGACACGGCCGTCTATTACTGTGCGAGAGATTTAGGAACCTACGATGACTCCTGGGGCCAGGGAGTCCTGGTCACCGTCTCCTCAG	EVQLVESGGGLVQPGGSLRLSCAASGFTFSNFGFHWVRQAPGKGLEWVAIISYDGITKYYADSVKDRFTVSRDNSKTMVYLQMNNLKLEDTAVYYCARDLGTYDDSWGQGVLVTVSS	17	4.82955	16	5.4	1	2.4
spleen_276	GAGGTGCAGCTGGTGGAGTCTGGAGGAGGCTTGGTTCAGCCGGGGGGTTCCCTGAGACTCTCCTGTGCAGCCTCTGGATTCACCTTCAGTAACTATGGCTTCCACTGGGTCCGCCAGGCTCCAGGGAAGGGGCTGGAGTGGGTGGCAATTATATCGTATGATGGAATTACGAAATACTACGCAGACTCTGTGAAGGACCGATTCACCGTCTCCAGAGACAATTCGAAGACCATGGTATATCTGCAAATGAACAACCTGAAATTGGAGGACACGGCCGTCTATTACTGTGCGAGAGATTTAGGAACCTACGATGACTCCTGGGGCCAGGGAGTCCTGGTCACCGTCTCCTCAG	EVQLVESGGGLVQPGGSLRLSCAASGFTFSNYGFHWVRQAPGKGLEWVAIISYDGITKYYADSVKDRFTVSRDNSKTMVYLQMNNLKLEDTAVYYCARDLGTYDDSWGQGVLVTVSS	15	4.26136	14	4.7	1	2.4
BM_3	GAGGTGCAGCTGGTGGAGTCTGGAGGAGGCTTGGTTCAGCCGGGGGGTTCCCTGAGACTCTCCTGTACAGCCTCTGGATTCACCTTCAGTAACTATGGCTTCCACTGGGTCCGCCAGGCTCCAGGGAAGGGGCTGGAGTGGGTGGCAATTATATCGTATGATGGAATTACGAAACACTACGCAGACTCTGTGAAGGACCGATTCACCGTCTCCAGAGACAATTCCAAGACCATGGTGTATCTGCAAATGAACAACCTGAAATTGGACGACACGGCCGTCTATTACTGTGCGAGAGATTTAGGAACCTACGATGACTCCTGGGGCCAGGGAGTCCTGGTCACCGTCTCCTCAG	EVQLVESGGGLVQPGGSLRLSCTASGFTFSNYGFHWVRQAPGKGLEWVAIISYDGITKHYADSVKDRFTVSRDNSKTMVYLQMNNLKLDDTAVYYCARDLGTYDDSWGQGVLVTVSS	18	5.11364	17	5.7	1	2.4
BM_2	GAGGTGCAGCTGGTGGAGTCTGGAGGAGGCTTGGTTCAGCCGGGGGGTTCCCTGAGACTCTCCTGTACAGCCTCTGGATTCACCTTCAGTAACTATGGCTTCCACTGGGTCCGCCAGGCTCCAGGGAAGGGGCTGGAGTGGGTGACAATTATATCGTATGATGGAATTACGAAACACTACGCAGACTCTGTGAAGGACCGATTCACCGTCTCCAGAGACAATTCCAAGACCATGGTGTATCTGCAAATGAACAACCTGAAATTGGACGACACGGCCGTCTATTACTGTGCGAGAGATTTAGGAACCTACGATGACTCCTGGGGCCAGGGAGTCCTGGTCACCGTCTCCTCAG	EVQLVESGGGLVQPGGSLRLSCTASGFTFSNYGFHWVRQAPGKGLEWVTIISYDGITKHYADSVKDRFTVSRDNSKTMVYLQMNNLKLDDTAVYYCARDLGTYDDSWGQGVLVTVSS	19	5.39773	18	6.1	1	2.4
spleen_562	GAGGTGCAGCTGGTGGAGTCTGGAGGAGGCTTGGTTCAGCCGGGGGGTTCCCTGAGACTCTCCTGTACAGCCTCTGGATTCACCTTCAGTAACTATGGCTTCCACTGGGTCCGCCAGGCTCCAGGGAAGGGGCTGGAGTGGGTGACAATTATATCGTATGATGGAATTACGAAACACTACGCAGACTCTGTGAAGGACCGATTCACCGTCTCCAGAGACAATTCCAAGACCATGGTGTATCTGCAAATGAACAACCTGAAATTGGACGACACGGCCGTCTATTACTGTGCGAGAGATTTAGGAACCTACGATGACTCCTGGGGCCAGGGAGTCCTGGTCACCGTCTCCTCAG	EVQLVESGGGLVQPGGSLRLSCTASGFTFSNYGFHWVRQAPGKGLEWVTIISYDGITKHYADSVKDRFTVSRDNSKTMVYLQMNNLKLDDTAVYYCARDLGTYDDSWGQGVLVTVSS	19	5.39773	18	6.1	1	2.4
mAb 23	GAGGTGCAGCTGGTGGAGTCTGGAGGAGGCTTGGTTCAGCCGGGGGGTTCCCTGAGACTCTCCTGTACAGCCTCTGGATTCACCTTCAGTAACTATGGCTTCCACTGGGTCCGCCAGGCTCCAGGGAAGGGGCTGGAGTGGGTGACAATTATATCGTATGATGGAATTACGAAACACTACGCAGACTCTGTGAAGGACCGATTCACCGTCTCCAGAGACAATTCCAAGACCATGGTGTATCTGCAAATGAACAACCTGAAATTGGACGACACGGCCGTCTATTACTGTGCGAGAGATTTAGGAACCTACGATGACTCCTGGGGCCAGGGAGTCCTGGTCACCGTCTCCTCAG	EVQLVESGGGLVQPGGSLRLSCTASGFTFSNYGFHWVRQAPGKGLEWVTIISYDGITKHYADSVKDRFTVSRDNSKTMVYLQMNNLKLDDTAVYYCARDLGTYDDSWGQGVLVTVSS	19	5.39773	18	6.1	1	2.4
perLN_22	GAGGTGCAGCTGGTGGAGTCTGGAGGAGGCTTGGTTCAGCCGGGGGGGTCCCTGAGACTCTCCTGTGCAGCCTCTGGATTCACCTTCAGTAGCTATGGCATGCACTGGGTCCGCCAGGCTCCAGGGAAGGGGCTGGAGTGGGTGGCAATTATATCGTATGATGGAAGTACGAAATACTACGCAGACTCTGTGAAGGACCGATTCACCATCTCCAGAGACAATTCCAAGACCATGCTATATCTTCAAATGAACAACCTGAAATTGGAAGACACGGCCGTCTATTACTGTGCGAGAGATTTAGGAACCTACGATGACTCCTGGGGCCAGGGAGTCCTGGTCACCGTCTCCTCAG	EVQLVESGGGLVQPGGSLRLSCAASGFTFSSYGMHWVRQAPGKGLEWVAIISYDGSTKYYADSVKDRFTISRDNSKTMLYLQMNNLKLEDTAVYYCARDLGTYDDSWGQGVLVTVSS	7	1.98864	6	2	1	2.4
iLN_194	GAGGTGCAGCTGGTGGAGTCTGGAGGAGGCTTGGTTCAGCCGGGGGGGTCCCTGAGACTCTCCTGTGCAGCCTCTGGATTCACCTTCAGTAGCTATGGCATGCACTGGGTCCGCCAGGCTCCAGGGAAGGGGCTGGAGTGGGTGGCAATTATATCGTATGATGGAAGTACGAAATACTACGCAGACTCTGCGAAGGACCGATTCACCATCTCCAGAGACAATTCCAAGACCATGCTATATCTTCAAATGAACAACCTGAAATTGGAGGACACGGCCGTCTATTACTGTGCGAGAGATTTAGGAACCTACGATGACTCCTGGGGCCAGGGAGTCCTGGTCACCGTCTCCTCAG	EVQLVESGGGLVQPGGSLRLSCAASGFTFSSYGMHWVRQAPGKGLEWVAIISYDGSTKYYADSAKDRFTISRDNSKTMLYLQMNNLKLEDTAVYYCARDLGTYDDSWGQGVLVTVSS	7	1.98864	6	2	1	2.4
iLN_6	GAGGTGCAGCTGGTGGAGTCTGGAGGAGGCGTGGTTCAGCCGGGGGGGTCCCTGAGACTCTCCTGTGCAGCCTCTGGATTCACCTTCAGTAGCTATGGCAGGCACTGGGTCCGCCAGGCTCCAGGGAAGGGGCTGGAGTGGGTGGCAATTATATCGTATGATGGAAGTACGAAATACTACGCAGACTCTGTGAAGGACCGATTCACCATCTCCAGAGACAATTCCAAGACCATGCTATATCTTCAAATGAACAACCTGAAATTGGAGGACACGGCCGTCTATTACTGTGCGAGAGATTTAGGAACCTACGATGACTCCTGGGGCCAGGGAGTCCTGGTCACCGTCTCCTCAG	EVQLVESGGGVVQPGGSLRLSCAASGFTFSSYGRHWVRQAPGKGLEWVAIISYDGSTKYYADSVKDRFTISRDNSKTMLYLQMNNLKLEDTAVYYCARDLGTYDDSWGQGVLVTVSS	8	2.27273	7	2.4	1	2.4
iLN_20	GAGGTGCAGCTGGTGGAGTCTGGAGGAGGCTTGGTTCAGCCGGGGTGGTCCCTGAGACTCTCCTGTGCAGCCTCTGGATTCACCTTCAGTAGCTATGGCATGCACTGGGTCCGCCAGGCTCCAGGGAAGGGGCTGGAGTGGGTGGCAATTATATCGTATGATGGAAGTACGAAATACTACGCAGACTCTGTGAAGGACCGATTCACCATCTCCAGAGACAATTCCAAGACCATGCTATATCTTCAAATGAACAACCTGAAATTGGAGGACACGGCCGTCTATTACTGTGCGAGAGATTTAGGAACCTACGATGACTCCTGGGGCCAGGGAGTCCTGGTCACCGTCTCCTCAG	EVQLVESGGGLVQPGWSLRLSCAASGFTFSSYGMHWVRQAPGKGLEWVAIISYDGSTKYYADSVKDRFTISRDNSKTMLYLQMNNLKLEDTAVYYCARDLGTYDDSWGQGVLVTVSS	7	1.98864	6	2	1	2.4
iLN_2315	GAGGTGCAGCTGGTGGAGTCTGGAGGAGGCTTGGTTCAGCCGGGGGGGTCCCTGAGACTCTCCTGTGCAGCCTCTGGATTCACCTTCAGTAGCTATGGCATGCACTGGGTCCGCCAGGCTCCAGGGAAGGGGCTGGAGTGGGTGGCAATTATATCGTATGATGGAAGTACGAAATACTACGCAGACTCTGTGAAGGACCGATTCACCATCTCCAGAGACAATTCCAAGACCATGCTATATCTTCAAATGAACAACCTGAAATTGGAGGACACGGCCGTCTATTACTGTGCGAGAGATTTAGGAACCTACGATGACTCCTGGGGCCAGGGAGTCCTGGTCACCGTCTCCTCAG	EVQLVESGGGLVQPGGSLRLSCAASGFTFSSYGMHWVRQAPGKGLEWVAIISYDGSTKYYADSVKDRFTISRDNSKTMLYLQMNNLKLEDTAVYYCARDLGTYDDSWGQGVLVTVSS	6	1.70455	5	1.7	1	2.4
blood_1089	GAGGTGCAGCTGGTGGAGTCTGGAGGAGGCTTGGTTCAGCCGGGGGGGTCCCTGAGACTCTCCTGTGCAGCCTCTGGATTCACCTTCAGTAGCTATGGCATGCACTGGGTCCGCCAGGCTCCAGGGAAGGGGCTGGAGTGGGTGGCAATTATATCGTATGATGGAAGTACGAAATACTACGCAGACTCTGTGAAGGACCGATTCACCATCTCCAGAGACAATTCCAAGACCATGCTATATCTTCAAATGAACAACCTGAAATTGGAGGACACGGCCGTCTATTACTGTGCGAGAGATTTAGGAACCTACGATGACTCCTGGGGCCAGGGAGTCCTGGTCACCGTCTCCTCAG	EVQLVESGGGLVQPGGSLRLSCAASGFTFSSYGMHWVRQAPGKGLEWVAIISYDGSTKYYADSVKDRFTISRDNSKTMLYLQMNNLKLEDTAVYYCARDLGTYDDSWGQGVLVTVSS	6	1.70455	5	1.7	1	2.4
iLN_3083	GAGGTGCAGCTGGTGGAGTCTGGAGGAGGCTTGGTTCAGCCGGGGGGGTCCCTGAGACTCTCCTGTGCAGCCTCTGGATTCACCTTCAGTAGCTATGGCATGCACTGGGTCCGCCAGGCTCCAGGGAAGGGGCTGGAGTGGGTGGCAATTATATCGTATGATGGAAGTACGAAATACTACGCAGACTCTGTGAAGGACCGATTCACCATCTCCAGAGACAATTCCAAGACCATGCTATATCTTCAAATGAACAACCTGAAATTGGAGGACACGGCCGTCTATTACTGTGCGAGAGATTTAGGAACCTACGATGACTCCTGGGGCCAGGGAGTCCTGGTCACCGTCTCCTCAG	EVQLVESGGGLVQPGGSLRLSCAASGFTFSSYGMHWVRQAPGKGLEWVAIISYDGSTKYYADSVKDRFTISRDNSKTMLYLQMNNLKLEDTAVYYCARDLGTYDDSWGQGVLVTVSS	6	1.70455	5	1.7	1	2.4
blood_14	GAGGTGCAGCTGGTGGAGTCTGGAGGAGGCTTGGTTCAGCCGGGGGGGTCCCTGAGACTCTCCTGTGCAGCCTCTGGATTCACCTTCAGTAGCTATGGCATGCACTGGGTCCGCCAGGCTCCAGGGAAGGGGCTGGAGTGGGTGGCAATTATATCGTATGATGGAAGTACGAAATACTACGCAGACTCTGTGAAGGACCGATTCACCATCTCCAGAGACAATTCCAAGACCATGCTATATCTTCAAATGAACAACCTGAAATTGGAGGACACGGCCGTCTATTACTGTGCGAGAGATTTAGGAACCTACGATGACTCCTGGGGCCAGGGAGTCCTGGTCACCGTCTCCTCAG	EVQLVESGGGLVQPGGSLRLSCAASGFTFSSYGMHWVRQAPGKGLEWVAIISYDGSTKYYADSVKDRFTISRDNSKTMLYLQMNNLKLEDTAVYYCARDLGTYDDSWGQGVLVTVSS	6	1.70455	5	1.7	1	2.4
perLN_80	GAGGTGCAGCTGGTGGAGTCTGGAGGAGGCTTGGTTCAGCCGGGGGGGTCCCTGAGACTCTCCTGTGCAGCCTCTGGATTCACCTTCAGTAGCTATGGCATGCACTGGGTCCGCCAGGCTCCAGGGAAGGGGCTGGAGTGGGTGGCAATTATATCGTATGATGGAAGTACGAAATACTACGCAGACTCTGTGAAGGACCGATTCACCATCTCCAGAGACAATTCCAAGACCATGCTATATCTTCAAATGAACAACCTGAAATTGGAGGACACGGCCGTCTATTACTGTGCGAGAGATTTAGGAACCTACGATGACTCCTGGGGCCAGGGAGTCCTGGTCACCGTCTCCTCAG	EVQLVESGGGLVQPGGSLRLSCAASGFTFSSYGMHWVRQAPGKGLEWVAIISYDGSTKYYADSVKDRFTISRDNSKTMLYLQMNNLKLEDTAVYYCARDLGTYDDSWGQGVLVTVSS	6	1.70455	5	1.7	1	2.4
iLN_689	GAGGTGCAGCTGGTGGAGTCTGGAGGAGGCTTGGTTCAGCCGGGGGGGTCCCTGAGACTCTCCTGTGCAGCCTCTGGATTCACCTTCAGTAGCTATGGCATGCACTGGGTCCGCCAGGCTCCAGGGAAGGGGCTGGAGTGGGTGGCAATTATATCGTATGATGGAAGTACGAAATACTACGCAGACTCTGTGAAGGACCGATTCACCATCTCCAGAGACAATTCCAAGACCATGCTATATCTTCAAATGAACAACCTGAAATTGGAGGACACGGCCGTCTATTACTGTGCGAGAGATTTAGGAACCTACGATGACTCCTGGGGCCAGGGAGTCCTGGTCATCGTCTCCTCAG	EVQLVESGGGLVQPGGSLRLSCAASGFTFSSYGMHWVRQAPGKGLEWVAIISYDGSTKYYADSVKDRFTISRDNSKTMLYLQMNNLKLEDTAVYYCARDLGTYDDSWGQGVLVIVSS	7	1.98864	5	1.7	2	4.9
perLN_298	GAGGTGCAGCTGGTGGAGTCTGGAGGAGGCTTGGTTCAGCCGGGGGGGTCCCTGAGACTCTCCTGTGCAGCCTCTGGATTCACCTTCAGTCGTTATGGCATACACTGGGTCCGCCAGGCTCCAGGGAAGGGGCTGGAGTGGGTGGCAATGATTTCGTCTGATGGAAGTGGGAAATACTACGCAGACTCTGTGAAGGACCGCTTCACCATCTCCAGAGACAATTCCAAGAGCATGCTATATCTTCAAATGAACAACCTGAAATTGGAGGACACGGCCGTCTATTACTGTGCGAGAGATTTAGGGACCTACGATGACTCCTGGGGCCAGGGAGTCCTGGTCAGCGTCTCCTCAG	EVQLVESGGGLVQPGGSLRLSCAASGFTFSRYGIHWVRQAPGKGLEWVAMISSDGSGKYYADSVKDRFTISRDNSKSMLYLQMNNLKLEDTAVYYCARDLGTYDDSWGQGVLVSVSS	17	4.82955	13	4.4	2	4.9
iLN_37	GAGGTGCAGCTGGTGGAGTCTGGAGGAGGCTTGGTTCAGCCGGGGGGGTCCCTGAGACTCTCCTGTGCAGCCTCTGGATTCACCTTCAGTAGCTATGGCATGCACTGGGTCCGCCAGGCTCCAGGGAAGGGGCTGGAGTGGGTGGCAATTATATCGTTTGATGGAAGTACGAAATACTACGCAGACTCTGTGAAGGACCGATTCACCATCTCCAGAGACAATTCCAAGACCATGCTATATCTTCAAATGAACAACCTGAAATTGGAGGACACGGCCGTCTATTACTGTGCGAGAGATTTAGGGACCTACGATGACTCCTGGGGCCAGGGAGTCCTGGTCACCGTCTCCTCAG	EVQLVESGGGLVQPGGSLRLSCAASGFTFSSYGMHWVRQAPGKGLEWVAIISFDGSTKYYADSVKDRFTISRDNSKTMLYLQMNNLKLEDTAVYYCARDLGTYDDSWGQGVLVTVSS	8	2.27273	6	2	1	2.4
iLN_441	GAGGTGCAGCTGGTGGAGTCTGGAGGAGGCTTGGTTCAGCCGGGGGGGTCCCTGAGACTCTCCTGTGCAGCCTCTGGATTCACCTTCAGTAGCTATGGCATGCACTGGGTCCGCCAGGCTCCAGGGAAGGGGCTGGAGTGGGTGGCAATTATATCGTTTGATGGAAGTACGAAATACTACGCAGACTCTGTGAAGGACCGATTCACCATCTCCAGAGACAATTCCAAGACCATGCTATATCTTCAAATGAACAACCTGAAATTGGAGGACACGGCCGTCTATTACTGTGCGAGAGATTTAGGGACCTACGATGACTCCTGGGGCCAGGGAGTCCTGGTCACCGTCTCCTCAG	EVQLVESGGGLVQPGGSLRLSCAASGFTFSSYGMHWVRQAPGKGLEWVAIISFDGSTKYYADSVKDRFTISRDNSKTMLYLQMNNLKLEDTAVYYCARDLGTYDDSWGQGVLVTVSS	8	2.27273	6	2	1	2.4
perLN_67	GAGGTGCAGCTGGTGGAGTCTGGAGGAGGTTTGGTTCAGCCGGGGGGGTCCCTGAGACTCTCCTGTGGAGCCTCTGGATTCGCCTTCAGTACCTATGGCATGCACTGGGTCCGCCAGGCTCCAGGGAAAGGGCTGGAGTGGTTGGCAATTATATCGTCTGATGTAAGGACGAAATATTACGCAGACTCTGTGAAGGACCGATTCACCATCTCCAGAGACAATTCCAAGACCATGGTCTATCTTCAAATGAACAACCTGAAATTGGAGGACACGGCCGTCTATTTCTGTGCGAGAGATTTAGGAACCTACGATGACTCCTGGGGCCAGGGAGTCCTGGTCACCGTCTCCTCAG	EVQLVESGGGLVQPGGSLRLSCGASGFAFSTYGMHWVRQAPGKGLEWLAIISSDVRTKYYADSVKDRFTISRDNSKTMVYLQMNNLKLEDTAVYFCARDLGTYDDSWGQGVLVTVSS	19	5.39773	18	6.1	1	2.4
axLN_300	GAGGTGCAGCTGGTGGAGTCTGGAGGAGGCTTGGTTCAGCCGGGGGGGTCCCTGAGACTCTCCTGTGCAGCCTCTGGATTCGCCTTCAGTAGCTATGGCATGCACTGGGTCCGCCAGGCTCCAGGGAAAGGGCTGGAGTGGTTGGCAATTATATCGTCTGATGTAAGTACGAAATACTACGCAGACTCTGTGAAGGACCGATTCACCATCTCCAGAGACAATTCCAAGACCATGGTATATCTTCAAATGAACAACCTGAAATTGGAGGACACGGCCGTCTATTTCTGTGCGAGAGATTTAGGAACCTACGATGACTCCTGGGGCCAGGGAGTCCTGGTCACCGTCTCCTCAG	EVQLVESGGGLVQPGGSLRLSCAASGFAFSSYGMHWVRQAPGKGLEWLAIISSDVSTKYYADSVKDRFTISRDNSKTMVYLQMNNLKLEDTAVYFCARDLGTYDDSWGQGVLVTVSS	13	3.69318	12	4.1	1	2.4
perLN_143	GAGGTGCAGCTGGTGGAGTCTGGAGGAGGCTTGGTTCAGCCGGGGGGGTCCCTGAGACTCTCCTGTGCAGCCTCTGGATTCGCCTTCAGTAGCTATGGCATGCACTGGGTCCGCCAGGCTCCAGGGAAAGGGCTGGAGTGGTTGGCAATTATATCGTCTGATGTAAGTACGAAATACTACGCAGACTCTGTGAAGGACCGATTCACCATCTCCAGAGACAATTCCAAGACCATGGTATATCTTCAAATGAACAACCTGAAATTGGAGGACACGGCCGTCTATTTCTGTGCGAGAGATTTAGGAACCTACGATGACTCCTGGGGCCAGGGAGTCCTGGTCACCGTCTCCTCAG	EVQLVESGGGLVQPGGSLRLSCAASGFAFSSYGMHWVRQAPGKGLEWLAIISSDVSTKYYADSVKDRFTISRDNSKTMVYLQMNNLKLEDTAVYFCARDLGTYDDSWGQGVLVTVSS	13	3.69318	12	4.1	1	2.4
perLN_244	GAGGTGCAGCTGGTGGAGTCTGGAGGAGGCTTGGTTCAGCCGGGGGGGTCCCTGAGACTCTCCTGTGCAGCCTCTGGATTCACCTTCAGTAGATATGGCATGCACTGGGTCCGCCAGGCTCCAGGGAAGGGACTGGAGTGGGTGGCAATTATATCGTCTGATGGAATTACGAAATACTACGCAGACTCTGTGAAGGACCGATTCACCATCTCCAGAGACAATTCCAAGACCAAACTATATCTTCAAATGAACAACCTGAAATTGGAGGACACGGCCGTCTATTACTGTGCGAGAGATTTAGGAACCTACGATGACTCCTGGGGCCAGGGAGTCCTGGTCACCGTCTCCTCAG	EVQLVESGGGLVQPGGSLRLSCAASGFTFSRYGMHWVRQAPGKGLEWVAIISSDGITKYYADSVKDRFTISRDNSKTKLYLQMNNLKLEDTAVYYCARDLGTYDDSWGQGVLVTVSS	12	3.40909	11	3.7	1	2.4
perLN_24	GAGGTGCAGTTGGTGGAGTCTGGAGGAGGCTTGGTTCAGCCGGGGGGGTCCCTGAGACTCTCCTGTGCAGCCTCTGGATTCACCTTCAGTAGATATGGCATGCACTGGGTCCGTCAGGCTCCAGGGAAGGGACTGGAGTGGGTGGCAATTATATCGTCTGATGGAATTACGAAATACTACGCAGACTCTGTGAAGGACCGATTCACCATCTCCAGAGACAATTCCAAGACCAAACTATATCTTCAAATGAACAACCTGAAATTGGAGGACACGGCCGTCTATTACTGTGCGAGAGATTTAGGAACCTACGATGACTCCTGGGGCCAGGGAGTCCTGGTCACCGTCTCCTCAG	EVQLVESGGGLVQPGGSLRLSCAASGFTFSRYGMHWVRQAPGKGLEWVAIISSDGITKYYADSVKDRFTISRDNSKTKLYLQMNNLKLEDTAVYYCARDLGTYDDSWGQGVLVTVSS	14	3.97727	13	4.4	1	2.4
spleen_177	GAAGTGCAGCTGGTGGAGTCTGGAGGAGGCTTGGTTCAGCCGGGGGGGTCCCTGAGACTCTCCTGTGCAGCCTCTGGATTCACCTTCAGTAGATATGGCATGCACTGGGTCCGCCAGGCTCCAGGGAAGGGACTGGAGTGGGTGGCAATTATATCGTCTGATGGAATTACGAGATACTACGCAGACTCTGTGAAGGACCGATTCACCATCTCCAGAGACAATTCCAAGACCAAACTATATCTTCAAATGGACAACCTGAAATTGGAGGACACGGCCGTCTATTACTGTGCGAGAGATTTAGGAACCTACGATGACTCCTGGGGCCAGGGAGTCCTGGTCACCGTCTCCTCAG	EVQLVESGGGLVQPGGSLRLSCAASGFTFSRYGMHWVRQAPGKGLEWVAIISSDGITRYYADSVKDRFTISRDNSKTKLYLQMDNLKLEDTAVYYCARDLGTYDDSWGQGVLVTVSS	15	4.26136	14	4.7	1	2.4
perLN_182	GAGGTGCAGCTGGTGGAGTCTGGAGGAGGCTTGGTTCAGCCGGGGGGGTCCATGAGACTCTCCTGTGCAGCCTCTGGATTCACCTTCAGTAGATATGGCATGCACTGGGTCCGCCAGGCTCCAGGGAAGGGACTGGAGTGGGTGGCAATTATTTCGTCTGATGGAATGACGAAATACTACGCAGACTCTGTGAAGGACCGATTCACCATCTCCAGAGACAATTCCAAGACCATAGTATATCTTCAAATGAACAACCTGAAATTGGAGGACACGGCCGTCTATTACTGTGCGAGAGATTTAGGAACCTACGATGACTCCTGGGGCCAGGGAGTCCTGGTCACCGTCTCCTCAG	EVQLVESGGGLVQPGGSMRLSCAASGFTFSRYGMHWVRQAPGKGLEWVAIISSDGMTKYYADSVKDRFTISRDNSKTIVYLQMNNLKLEDTAVYYCARDLGTYDDSWGQGVLVTVSS	15	4.26136	14	4.7	1	2.4
perLN_53	GAGGTGCAGCTGGTGGAGTCTGGAGGAGGCTTGGTTCAGCCGGGGGGGTCCCTGAGACTCTCCTGTGCAGCCTCTGGATTCACCTTCAGTAGATATGGCATGCACTGGGTCCGCCAGGCTCCAGGGAAGGGACTGGAGTGGGTGGCAATTATATCGTCTGATGGAATTACGAAATACTACGCAGACTCTGTGAAGGACCGGTTCACCATCTCCAGAGACAATTCCAAGACCATAGTATATCTTCAAATGAACAACCTGAAATTGGAGGACACGGCCGTCTATTACTGTGCGAGAGATTTAGGAACCTACGATGACTCCTGGGGCCAGGGAGTCCTGGTCACCGTCTCCTCAG	EVQLVESGGGLVQPGGSLRLSCAASGFTFSRYGMHWVRQAPGKGLEWVAIISSDGITKYYADSVKDRFTISRDNSKTIVYLQMNNLKLEDTAVYYCARDLGTYDDSWGQGVLVTVSS	13	3.69318	12	4.1	1	2.4
spleen_292	GAGGTGCAGCTGGTGGAGTCTGGAGGAGGCTTGGTTCAGCCGGGGGGGTCCCTGAGACTCTCCTGTGCAGCCTCTGGATTCACCTTCAGTAGATATGGCATGCACTGGGTCCGCCAGGCTCCAGGGAAGGGACTGGAGTGGGTGGCAATTATATCGTCTGATGGAATTACGAAATACTACGCAGACTCTGTGAAGGACCGGTTCACCATCTCCAGAGACAATTCCAAGACCATAGTATATCTTCAAATGAACAACCTGAAATTGGAGGACACGGCCGTCTATTACTGTGCGAGAGATTTAGGAACCTACGATGACTCCTGGGGCCAGGGAGTCCTGGTCACCGTCTCCTCAG	EVQLVESGGGLVQPGGSLRLSCAASGFTFSRYGMHWVRQAPGKGLEWVAIISSDGITKYYADSVKDRFTISRDNSKTIVYLQMNNLKLEDTAVYYCARDLGTYDDSWGQGVLVTVSS	13	3.69318	12	4.1	1	2.4
