# Supplementary material for: Multi-compartmental diversification of neutralizing antibody lineages dissected in SARS-CoV-2 spike-immunized macaques
Source: Nat Commun. 2024 Jul 27;15:6338. doi: 10.1038/s41467-024-50286-0 (PMC11283548; doi:10.1038/s41467-024-50286-0)
Supplement: Supplementary file 8 — Dataset 5 [file 41467_2024_50286_MOESM8_ESM.xlsx]

## Sheet: RBD AA variants
	339		346	371		373	375	376	405	408	417	440	446	452	460	477	478	484		486		493	496	498	501	505
	G339D	G339H	R346T	S371F	S371L	S373P	S375F	T376A	D405N	R408S	K417N	N440K	G446S	L452S	N460K	S477N	T478K	E484K	E484A	F486V	F486S	Q493R	G496S	Q498R	N501Y	Y505H
Beta											94.6			0.1			0.1	88.2							88.9
BA.1	93.5		0.1	0.4	85	86	85.8	0.3	0.3	0.3	62.7	64.8	66.3	0.3		87.5	87.9		87.5			87.2	84.2	84.2	84.6	84.7
BA.2	96.4	0.1	0.3	94.3	0.2	96.2	95.8	94.6	96.4	92.3	93.5	85.6	0.2	0.5	0.1	93.7	93.8		93.7	0.4		91.9	0.1	91.2	91.5	91.5
BA.4	97.6		1.1	95.6		97.8	97.3	96.5	97.6	87.8	94	89.3		94		96.7	96.6		96.6	96		0.1		94.9	95.2	95.2
BA.5	96.9	0.2	2.3	95.5	0.1	96.6	96.2	95.9	97.1	90.3	93.5	89.5	0.3	92.1	0.4	94.8	95.1		95.1	93.9	0.2			94.1	94.4	93.7
BA.2.75	7.5	81.3	6.4	84.8		84.6	82.9	82.5	86.9	76.6	75.3	80.1	79.6	5.3	82.9	82.8	82.4		78.9	1.3	2.8	0.1		81.1	81.3	80.4
BA.2.75.2	0.6	95.9	95.4	93.7		95.1	94.7	94.5	96.1	88.6	89.1	91.7	92.2	1.3	93.1	95.1	94.8		94.8		94.6			94.4	94.4	94.1
BA.4.6	98.1		97.6	97.4		98.1	98	97.7	98.4	93.4	95.5	89.8	0.1	95.3		97.1	97.1		97.1	97				96.9	97	96.6
		>10% frequency
